# Supplementary material for: Twenty‐Four‐Hour Urinary Sodium and Potassium Excretion in China: A Systematic Review and Meta‐Analysis
Source: PubMed Central journal article supplement (PMC6662145; doi:10.1161/jaha.119.012923), 2019-07-11
Supplement: JAH3-8-e012923-s001.pdf [file JAH3-8-e012923-s001.pdf]

# **SUPPLEMENTAL MATERIAL**

## Data S1. Search strategies

Database: **MEDLINE** (via Ovid)

Dates: from 1946 to 1st February 2019

Search terms: 1. exp Sodium Chloride/ OR exp Sodium/ OR salt.mp OR exp Potassium/  
2. exp China/ OR Chinese.mp OR exp Taiwan/  
3. dietary.mp OR intake.mp OR urinary.mp  
4. 1 AND 2 AND 3

Database: **EMBASE**

Dates: from 1974 to 1st February 2019

Search terms: 1. 'sodium chloride'/exp OR 'sodium chloride' OR 'sodium'/exp OR 'sodium'  
OR 'salt' OR 'potassium'/exp OR 'potassium'  
2. 'china'/exp OR 'china' OR 'chinese'/exp OR 'chinese' OR 'taiwan'/exp OR  
'taiwan'  
3. 'dietary' OR 'intake' OR 'urinary'  
4. 1 AND 2 AND 3

Database: **Scopus**

Dates: from 1980 to 1st February 2019

Search terms: 1. 'sodium chloride' OR 'sodium' OR 'salt' OR 'potassium'  
2. 'china' OR 'chinese' OR 'taiwan'

3. 'dietary' OR 'intake' OR 'urinary'

4. 1 AND 2 AND 3

Database: **China National Knowledge Infrastructure (CNKI)**

Dates: from 1979 to 1st February 2019

Search terms: 1. SU = ('盐' + '钠' + '食用盐' + '食用钠' + '钾')

2. SU = ('中国' + '中国人' + '我国' + '台湾')

3. SU = ('消耗' + '摄入' + '食用' + '尿')

4. 1 \* 2 \* 3

Database: **WanFang**

Dates: unclear start date, to 1st February 2019

Search terms: 1. 主题: ('盐' + '钠' + '食用盐' + '食用钠' + '钾')

2. 主题: ('中国' + '中国人' + '我国' + '台湾')

3. 主题: ('消耗' + '摄入' + '食用' + '尿')

4. 1 \* 2 \* 3

## **Data S2. Quality analyses of the studies included in the systematic review and meta-analysis**

- Appropriate sample frame? Whether the sample frame was appropriate to address the target population (eg, if the target population consisted of the Chinese adult population, choosing the outpatient department of a single hospital was not considered an appropriate sampling frame and was therefore marked as 'high risk').
- Appropriate sampling method? Whether the sample was representative of the population (eg, convenience samples were not considered appropriate and was therefore marked as 'high risk').
- Adequate sample size (sample size calculation)? Whether a sample size calculation to detect a difference in sodium or potassium intake was made (eg, a sample size calculation to detect a difference in systolic blood pressure was not considered to be appropriate and was therefore marked as 'high risk').
- Detailed description of subjects and setting? Whether the study sample was described in sufficient details so that other researchers can determine if it is comparable to the population of interest to them (eg, not providing study sites was not to be considered appropriate and was therefore marked as 'high risk').
- Sufficient coverage of the data analysis? Coverage bias: whether all subgroups of the identified sample responded at the same rate (if separate response rates were not provided for the different subgroups of the sample, this was marked as 'unclear risk').
- Valid data collection methods (completeness of samples assessed)? Measurement bias: whether the completeness of the urine samples was assessed or not (if not reported in the article, this was marked as 'unclear risk').
- Standardised data collection (staff trained, instructions given)? Whether the study staff were trained in 24h urine samples collection and whether the participants were given

clear instructions for collection (both criteria had to be met for this domain to be marked as 'low risk')

- Appropriate calculation of sodium or potassium excretion? Whether enough details were provided on how the sodium or potassium excretion values were obtained from the urine samples.
- Adequate response rate? Whether there was a minimum of 80% response rate (if not, this was marked as 'high risk').

**Table S1. Characteristics of included studies**

Children aged 3–6 years

| Study                         | Design                          | Site                                                             | Study dates  | Population              | n                                                                    | Sodium excretion $\pm$ SE, mmol/24h | Potassium excretion $\pm$ SE, mmol/24h | Creatinine excretion $\pm$ SE, mmol/24h | Urine volume $\pm$ SE, ml/24h | Assessment of 24h urine completeness |
|-------------------------------|---------------------------------|------------------------------------------------------------------|--------------|-------------------------|----------------------------------------------------------------------|-------------------------------------|----------------------------------------|-----------------------------------------|-------------------------------|--------------------------------------|
| Liu et al, 1987 <sup>1</sup>  | Non-randomised controlled trial | Two kindergartens of the Capital Iron and Steel Company, Beijing | Apr-May 1984 | Children aged 3-5 years | Experimental group (baseline)                                        | 36                                  | 108.9 $\pm$ 4.39                       | 18.3 $\pm$ 0.9                          | 2.02 $\pm$ 0.15               | NR                                   |
|                               |                                 |                                                                  |              |                         | Control group (baseline)                                             | 37                                  | 91.3 $\pm$ 9.27                        | 17.6 $\pm$ 0.98                         | 1.24 $\pm$ 0.1                |                                      |
| Yang et al, 1991 <sup>2</sup> | Pre-post trial                  | Wuhan                                                            | NR           | Children aged 4-6 years | Before saline load: family history of essential hypertension         | 35                                  | 71.89 $\pm$ 3.89                       | 11.28 $\pm$ 0.72                        |                               | NR                                   |
|                               |                                 |                                                                  |              |                         | Before saline load: without family history of essential hypertension | 51                                  | 77.25 $\pm$ 2.92                       | 11.63 $\pm$ 0.6                         |                               |                                      |

Children aged 6–16 years

| Study                        | Design          | Site                                          | Study dates | Population                       | n   | Sodium excretion $\pm$ SE, mmol/24h | Potassium excretion $\pm$ SE, mmol/24h | Creatinine excretion $\pm$ SE, mmol/24h | Urine volume $\pm$ SE, ml/24h | Assessment of 24h urine completeness                                                                                    |
|------------------------------|-----------------|-----------------------------------------------|-------------|----------------------------------|-----|-------------------------------------|----------------------------------------|-----------------------------------------|-------------------------------|-------------------------------------------------------------------------------------------------------------------------|
| Zhu et al, 1987 <sup>3</sup> | Cross-sectional | Two community primary schools in Wuhan, China | 1984-85     | Second-grade boys aged 7-8 years | 148 | 128.75 $\pm$ 2.95                   | 19.69 $\pm$ 0.54                       | 3.66 $\pm$ 0.06                         |                               | Ascertained each day; specimens with 24h creatinine <10 mg/kg body weight discarded and an additional one was collected |
|                              |                 |                                               | NR          | Male                             | 94  | 181.5 $\pm$ 6.69                    | 23.84 $\pm$ 0.85                       |                                         |                               | Not assessed                                                                                                            |

|                                           |                             |                                                              |                   |                                                                                                                           |                                     |     |              |            |            |         |                                                           |
|-------------------------------------------|-----------------------------|--------------------------------------------------------------|-------------------|---------------------------------------------------------------------------------------------------------------------------|-------------------------------------|-----|--------------|------------|------------|---------|-----------------------------------------------------------|
| Wu et al, 1991 <sup>4</sup>               | Cross-sectional             | Rural district of Hanzhong municipality, Shaanxi Province    |                   | Secondary school students aged 12-16 years                                                                                | Female                              | 87  | 166.5±6.55   | 21.54±0.88 |            |         |                                                           |
|                                           |                             |                                                              |                   |                                                                                                                           | Total                               | 181 | 174.3±4.71   | 22.74±0.62 |            |         |                                                           |
| Xu et al, 2009 <sup>5</sup>               | Cross-sectional             | Xinjiang Baliken area                                        | Aug-Sep 2005      | Kazakhstan Clan children aged 9-10 years                                                                                  |                                     | 49  | 190.81±8.14  | 29.35±1.55 | 11.34±0.63 |         | NR                                                        |
| Zhang et al, 2012 <sup>6</sup>            | Pre-post trial              | Department of Pediatrics of Peking University First Hospital | NR                | Healthy controls, mean age 13 years (SD=3)                                                                                | Control group                       | 10  | 193.88±28.81 |            |            |         | NR                                                        |
| Li et al, 2015 <sup>7</sup>               | Pre-post trial              | Peking University First Hospital                             | Jun 2012-May 2014 | Healthy controls, mean age 11.0 years (SD=4.0)                                                                            | Control group                       | 10  | 221.3±32.76  |            |            |         | NR                                                        |
| Zhang et al, 2015 [children] <sup>8</sup> | Cross-sectional             | Huairou District, Beijing                                    | Apr 2012          | Mean age 10.0 years (SD=3.2) in children, 42.3 years (SD=9.4) in adults                                                   | Children                            | 16  | 169.4±11.33  | 34.8±2.65  | 6±1        | 1037±66 |                                                           |
| Li et al, 2015 <sup>9</sup>               | Cross-sectional             | Department of Pediatrics, Peking University First Hospital   | Jun 2012-Feb 2014 | Children with postural tachycardia syndrome, mean age 11.2 years (SD=2.0); healthy controls, mean age 11.1 years (SD=2.4) | 24h Una ≥124 mmol/24h               | 18  | 154±5.42     |            |            |         | NR                                                        |
|                                           |                             |                                                              |                   |                                                                                                                           | 24h Una ≤124 mmol/24=h              | 21  | 101±3.06     |            |            |         |                                                           |
| He et al, 2015                            | Randomised controlled trial | Primary schools in urban                                     | May 2013-Dec 2013 | School-EduSalt: fifth-graders (mean age                                                                                   | Control group - children (baseline) | 138 | 116.7±5.2    | 25.4±0.9   | 4.9±0.2    | 862±38  | New collection if missed one or more urine voids or spilt |

|                          |  |                          |  |                                                                                        |                                          |     |           |          |         |        |                                    |
|--------------------------|--|--------------------------|--|----------------------------------------------------------------------------------------|------------------------------------------|-----|-----------|----------|---------|--------|------------------------------------|
| [children] <sup>10</sup> |  | Changzhi, northern China |  | 10.1 years, SD=0.5) and adult members of their families (mean age 43.8 years, SD=12.2) | Intervention group - children (baseline) | 140 | 124.2±5.1 | 23.5±0.9 | 4.7±0.2 | 952±38 | >10% of the total 24h urine volume |
|--------------------------|--|--------------------------|--|----------------------------------------------------------------------------------------|------------------------------------------|-----|-----------|----------|---------|--------|------------------------------------|

Adults aged >16 years

| Study                          | Design          | Site                                                                       | Study dates       | Population                                                                               |                  | n   | Sodium excretion ±SE, mmol/24h | Potassium excretion ±SE, mmol/24h | Creatinine excretion ±SE, mmol/24h | Urine volume ±SE, ml/24h | Assessment of 24h urine completeness                                                                                                                            |
|--------------------------------|-----------------|----------------------------------------------------------------------------|-------------------|------------------------------------------------------------------------------------------|------------------|-----|--------------------------------|-----------------------------------|------------------------------------|--------------------------|-----------------------------------------------------------------------------------------------------------------------------------------------------------------|
| Tsai et al, 1980 <sup>11</sup> | Cross-sectional | Department of Internal Medicine of the National Taiwan University Hospital | Aug 1983-Aug 1987 | Healthy controls, aged 39.06 years (SD=2.01)                                             | Healthy controls | 36  | 150.59±1.72                    | 35.01±0.35                        |                                    |                          | Checked by daily urine creatinine excretion                                                                                                                     |
| Zhao et al, 1986 <sup>12</sup> | Cross-sectional | Xinjiang Autonomous Region                                                 | NR                | Men aged 40-59 years from communities with little migration and eating traditional foods | Kazak            | 92  | 248±9.59                       | 39.9±1.86                         |                                    |                          | NR                                                                                                                                                              |
|                                |                 |                                                                            |                   |                                                                                          | Han              | 82  | 188±9.06                       | 57.7±2.93                         |                                    |                          |                                                                                                                                                                 |
|                                |                 |                                                                            |                   |                                                                                          | Uygur            | 83  | 207±9.55                       | 52.5±2.9                          |                                    |                          |                                                                                                                                                                 |
| Liu et al, 1986 <sup>13</sup>  | Cross-sectional | Fuwai Hospital                                                             | 1981-83           | Healthy male doctors and technicians, aged 30-50 years                                   | 1st day          | 49  | 231.2±12.84                    |                                   |                                    |                          | Each participant was asked to return the specimens with assurance of correct collection. If a mistake was made in the collection, it had to be done over again. |
|                                |                 |                                                                            |                   |                                                                                          | 2nd day          | 49  | 249.5±13.3                     |                                   |                                    |                          |                                                                                                                                                                 |
|                                |                 |                                                                            |                   |                                                                                          | 3rd day          | 49  | 262.5±13.81                    |                                   |                                    |                          |                                                                                                                                                                 |
|                                |                 |                                                                            |                   |                                                                                          | 4th day          | 49  | 236.5±13.94                    |                                   |                                    |                          |                                                                                                                                                                 |
|                                |                 |                                                                            |                   |                                                                                          | 5th day          | 49  | 253.5±15.2                     |                                   |                                    |                          |                                                                                                                                                                 |
|                                |                 |                                                                            |                   |                                                                                          | 6th day          | 49  | 236.4±13.67                    |                                   |                                    |                          |                                                                                                                                                                 |
|                                | Cross-sectional | Northern China:                                                            | Nov 1984-         | Northern China: mean age 40.4                                                            | Men - North      | 498 | 226.9±3.98                     | 37.5±0.71                         | 11.11±0.18                         |                          | Not assessed                                                                                                                                                    |
|                                |                 |                                                                            |                   |                                                                                          | Men - South      | 504 | 179.4±3.25                     | 28.8±0.58                         | 11.28±0.14                         |                          |                                                                                                                                                                 |



|                                    |                 |                                                  |          |                                                                                                                                                                                                                                                                                                                                            |                          |            |            |           |           |              |                                                                                       |
|------------------------------------|-----------------|--------------------------------------------------|----------|--------------------------------------------------------------------------------------------------------------------------------------------------------------------------------------------------------------------------------------------------------------------------------------------------------------------------------------------|--------------------------|------------|------------|-----------|-----------|--------------|---------------------------------------------------------------------------------------|
| Kestelot et al, 1987 <sup>14</sup> |                 | region of Beijing; South China: region of Fuchow | Jan 1985 | years (SD=14.4) in men, 40.2 years (SD=14.4) in women; South China: 40.4 years (SD=14.4) in men, 40.5 years (SD=14.3) in women.                                                                                                                                                                                                            | Women - North            | 505        | 204.6±3.65 | 37.5±0.76 | 7.77±0.13 |              |                                                                                       |
|                                    |                 |                                                  |          |                                                                                                                                                                                                                                                                                                                                            | Women - South            | 501        | 172.4±3.15 | 29.7±0.52 | 7.62±0.09 |              |                                                                                       |
| Liu et al, 1987 <sup>15</sup>      | Cross-sectional | Fu-Wai Hospital, Beijing                         | 1984     | Healthy normotensive male employees, aged 27-50 years (mean 35)                                                                                                                                                                                                                                                                            | 50                       | 252.3±9.86 | 37.8±1.39  | 6±0.16    |           | Not assessed |                                                                                       |
| Rose et al, 1988 <sup>16</sup>     | Cross-sectional | Beijing, Nanning, Tianjin, Taiwan                | 1982-85  | INTERSALT: aged 20-59 years                                                                                                                                                                                                                                                                                                                | Beijing                  | 200        | 204.1±4.7  | 35.3±0.74 | 9.5±0.11  | 1370±36      | Assessed by a standardised interview                                                  |
|                                    |                 |                                                  |          |                                                                                                                                                                                                                                                                                                                                            | Nanning                  | 200        | 169.2±4.32 | 27.2±0.59 | 9.4±0.11  | 1220±36      |                                                                                       |
|                                    |                 |                                                  |          |                                                                                                                                                                                                                                                                                                                                            | Tianjin                  | 200        | 245.6±5.89 | 33.6±0.74 | 9.6±0.13  | 1700±42      |                                                                                       |
|                                    |                 |                                                  |          |                                                                                                                                                                                                                                                                                                                                            | Taiwan                   | 181        | 141.4±4.47 | 31.7±1.11 | 8.7±0.22  | 1160±36      |                                                                                       |
| He et al, 1991 <sup>17</sup>       | Cross-sectional | Puge County, Southern China                      | 1986     | Yi People Study - four male population groups: high-mountain Yi farmers at ~2,750 m above sea level (mean age 30.9 years, SD=11.5), mountainside Yi farmers at ~1,800 m elevation level (mean age 36.4 years, SD=14.3), Yi people who migrated to the county seat (mean age 39.3 years, SD=12.7), and native Han people of the county seat | High-mountain Yi farmers | 119        | 73.9±4.61  | 58.6±2.84 |           |              | Participants questioned about the completeness of the collection by a local physician |
|                                    |                 |                                                  |          |                                                                                                                                                                                                                                                                                                                                            | Mountainside Yi farmers  | 114        | 117.9±5.19 | 48.5±2.63 |           |              |                                                                                       |
|                                    |                 |                                                  |          |                                                                                                                                                                                                                                                                                                                                            | County seat Yi migrants  | 89         | 159.4±6.64 | 28.3±1.44 |           |              |                                                                                       |
|                                    |                 |                                                  |          |                                                                                                                                                                                                                                                                                                                                            | County seat Han people   | 97         | 186±7.41   | 29±1.06   |           |              |                                                                                       |

|                                |                 |                                                                           |              |                                                                                                   |                                                 |            |             |            |  |              |                                                                                                                    |
|--------------------------------|-----------------|---------------------------------------------------------------------------|--------------|---------------------------------------------------------------------------------------------------|-------------------------------------------------|------------|-------------|------------|--|--------------|--------------------------------------------------------------------------------------------------------------------|
|                                |                 |                                                                           |              | (mean age 36.4 years, SD=12.1)                                                                    |                                                 |            |             |            |  |              |                                                                                                                    |
| He et al, 1993 <sup>18</sup>   | Cross-sectional | Liangshan Yi People Autonomous Prefecture (Liangshan), Southwestern China | Apr 1989     | Yi Migrant Study: men aged 19-55 years                                                            | Rural sample: Yi farmers, day 1                 | 30         | 119.5±12.56 | 84±11.05   |  |              | Subjects asked to repeat collection if reported to be incomplete, or a timing error exceeding 30 minutes was noted |
|                                |                 |                                                                           |              |                                                                                                   | Rural sample: Yi farmers, day 2                 | 30         | 136.6±15.06 | 88.7±13.27 |  |              |                                                                                                                    |
|                                |                 |                                                                           |              |                                                                                                   | Rural sample: Yi farmers, day 3                 | 30         | 138.3±13    | 83.2±10.41 |  |              |                                                                                                                    |
|                                |                 |                                                                           |              |                                                                                                   | Urban sample: Yi migrants and Han people, day 1 | 33         | 171.6±11.12 | 29.1±2.12  |  |              |                                                                                                                    |
|                                |                 |                                                                           |              |                                                                                                   | Urban sample: Yi migrants and Han people, day 2 | 33         | 172.7±14.41 | 29.3±2.3   |  |              |                                                                                                                    |
|                                |                 |                                                                           |              |                                                                                                   | Urban sample: Yi migrants and Han people, day 3 | 33         | 188.9±9.35  | 30.7±2.33  |  |              |                                                                                                                    |
|                                |                 |                                                                           |              |                                                                                                   | Total, day 1                                    | 63         | 146.8±8.92  | 55.2±6.36  |  |              |                                                                                                                    |
|                                |                 |                                                                           |              |                                                                                                   | Total, day 2                                    | 63         | 155.5±10.58 | 57.6±7.41  |  |              |                                                                                                                    |
|                                |                 |                                                                           |              |                                                                                                   | Total, day 3                                    | 63         | 165.2±8.44  | 55.2±6.02  |  |              |                                                                                                                    |
| Chan et al, 1993 <sup>19</sup> | Cross-sectional | NR                                                                        | NR           | Healthy female university students and visitors of a family clinic, mean age 24.1 years (SD=7.09) | 142                                             | 129±4.4    | 35±1.26     | 7.5±0.17   |  | Not assessed |                                                                                                                    |
| Pan et al, 1994 <sup>20</sup>  | Cross-sectional | Taiwan                                                                    | Mar-Apr 1992 | Research staff of the Institute of Biomedical Sciences, Academia Sinica, in their 20s             | 40                                              | 151.3±8.11 | 37.1±2.18   |            |  | NR           |                                                                                                                    |
| Tian et al, 1995 <sup>21</sup> | Cross-sectional | Tianjin City                                                              | 1992         | Mean age 43.6 years (SD=13.6) in men, 43.5 years (SD=13.3) in women                               | Male                                            | 328        | 257.8±4.75  | 42.4±0.94  |  |              |                                                                                                                    |
|                                |                 |                                                                           |              |                                                                                                   | Female                                          | 335        | 249.2±4.45  | 45±0.99    |  |              |                                                                                                                    |
|                                | Pre-post trial  | NR                                                                        | NR           | Graduate school students and staff                                                                | Salt sensitive subjects                         | 9          | 221±13.33   | 66.97±4.04 |  | NR           |                                                                                                                    |

|                                  |                 |                                                                    |                   |                                                                                                                                                                   |                                |      |            |            |            |  |                                                                                                                                                             |
|----------------------------------|-----------------|--------------------------------------------------------------------|-------------------|-------------------------------------------------------------------------------------------------------------------------------------------------------------------|--------------------------------|------|------------|------------|------------|--|-------------------------------------------------------------------------------------------------------------------------------------------------------------|
| Hou et al, 1997 <sup>22</sup>    |                 |                                                                    |                   | members, aged 23-40 years                                                                                                                                         | Non-salt sensitive subjects    | 14   | 233±13.9   | 62.97±3.76 |            |  |                                                                                                                                                             |
| Chan et al, 1998 <sup>23</sup>   | Cross-sectional | Hong Kong                                                          | Oct 1989-May 1991 | Healthy subjects, aged 20-65 years                                                                                                                                | Men                            | 42   | 145.2±7.51 | 40.4±2.33  |            |  | Undercollection = creatinine output < 5.3 mmol in women and < 7.1 mmol in men; overcollection = creatinine output > 15.9 mmol in women and 17.7 mmol in men |
|                                  |                 |                                                                    |                   |                                                                                                                                                                   | Women                          | 84   | 135.3±5    | 41.3±1.56  |            |  |                                                                                                                                                             |
| Liu et al, 2000 <sup>24</sup>    | Cross-sectional | Taiwan, Shanghai, Urumiqi, Lhasa, Guizang, Guangzhou, Shijiazhuang | 1985-97           | WHO-CARDIAC: aged 48-65 years                                                                                                                                     | Total                          | 1389 | 189.5±3    | 32.1±0.6   | 9.06±0.09  |  | Assessed by urinary creatinine excretion in relation to weight                                                                                              |
|                                  |                 |                                                                    |                   |                                                                                                                                                                   | Urumigi                        | 200  | 209.6±11.5 | 44.7±1.7   | 9.86±0.44  |  |                                                                                                                                                             |
|                                  |                 |                                                                    |                   |                                                                                                                                                                   | Lhasa                          | 125  | 255.1±12   | 39.8±2.7   | 7.39±0.26  |  |                                                                                                                                                             |
|                                  |                 |                                                                    |                   |                                                                                                                                                                   | Guiyang                        | 206  | 142.2±4.9  | 23.3±0.7   | 7.74±0.18  |  |                                                                                                                                                             |
|                                  |                 |                                                                    |                   |                                                                                                                                                                   | Guangzhou                      | 217  | 140.8±5.7  | 21.1±0.8   | 9.06±0.26  |  |                                                                                                                                                             |
|                                  |                 |                                                                    |                   |                                                                                                                                                                   | Taiwan                         | 200  | 152±5      | 50.3±2     | 10.65±0.35 |  |                                                                                                                                                             |
|                                  |                 |                                                                    |                   |                                                                                                                                                                   | Shanghai                       | 225  | 224.4±6.5  | 26.4±0.7   | 9.77±0.18  |  |                                                                                                                                                             |
|                                  |                 |                                                                    |                   |                                                                                                                                                                   | Shijianzhuang                  | 216  | 219.5±7.3  | 32.3±1.1   | 8.27±0.18  |  |                                                                                                                                                             |
| Cheung et al, 2000 <sup>25</sup> | Cross-sectional | Queen Mary Hospital, Hong Kong                                     | NR                | Hypertensive outpatients: individuals referred to the hypertension outpatient clinic, mean age 46 years (SD=14); normotensive controls: mean age 41 years (SD=12) | Hypertensive patients - total  | 70   | 172±7.65   | 40±1.91    |            |  | NR                                                                                                                                                          |
|                                  |                 |                                                                    |                   |                                                                                                                                                                   | Hypertensive patients - male   | 43   | 176±10.52  | 43±2.74    |            |  |                                                                                                                                                             |
|                                  |                 |                                                                    |                   |                                                                                                                                                                   | Hypertensive patients - female | 27   | 165±10.78  | 35±2.12    |            |  |                                                                                                                                                             |
|                                  |                 |                                                                    |                   |                                                                                                                                                                   | Normotensive controls - total  | 47   | 161±7.73   | 51±2.33    |            |  |                                                                                                                                                             |
|                                  |                 |                                                                    |                   |                                                                                                                                                                   | Normotensive controls - male   | 21   | 175±10.47  | 54±3.49    |            |  |                                                                                                                                                             |
|                                  |                 |                                                                    |                   |                                                                                                                                                                   | Normotensive controls - female | 26   | 149±10.79  | 48±3.14    |            |  |                                                                                                                                                             |
| Gu et al, 2001 <sup>26</sup>     | Randomised      | North of Beijing                                                   | NR                | Aged 45-64 years                                                                                                                                                  | Assigned to potassium          | 75   | 175.6±7.44 | 35.8±1.79  | 6.25±0.24  |  | NR                                                                                                                                                          |

|                                   |                  |                                                                                   |                    |                                                                                                          |                                          |     |             |            |           |  |                                                                                                                                                                        |
|-----------------------------------|------------------|-----------------------------------------------------------------------------------|--------------------|----------------------------------------------------------------------------------------------------------|------------------------------------------|-----|-------------|------------|-----------|--|------------------------------------------------------------------------------------------------------------------------------------------------------------------------|
|                                   | controlled trial |                                                                                   |                    |                                                                                                          | supplementation (baseline)               |     |             |            |           |  |                                                                                                                                                                        |
|                                   |                  |                                                                                   |                    |                                                                                                          | Assigned to placebo (baseline)           | 75  | 188±8.37    | 36.2±1.37  | 6.83±0.26 |  |                                                                                                                                                                        |
| Zhu et al, 2001 <sup>27</sup>     | Cross-sectional  | Department of Cardiology, First Hospital of Xi'an Jiaotong University             | NR                 | Outpatients, mean age 48 years (SD=6) in hypertensives, 47 years (SD=8) in normotensives                 | High blood pressure - salt sensitive     | 17  | 239±17.22   |            |           |  | NR                                                                                                                                                                     |
|                                   |                  |                                                                                   |                    |                                                                                                          | High blood pressure - salt resistant     | 15  | 270±23.75   |            |           |  |                                                                                                                                                                        |
|                                   |                  |                                                                                   |                    |                                                                                                          | Non-high blood pressure - salt sensitive | 8   | 231±16.97   |            |           |  |                                                                                                                                                                        |
|                                   |                  |                                                                                   |                    |                                                                                                          | Non-high blood pressure - salt resistant | 13  | 193±18.86   |            |           |  |                                                                                                                                                                        |
| Jumabay et al, 2001 <sup>28</sup> | Cross-sectional  | Barkol area in the Xinjiang region                                                | NR                 | Kazakh and Han people aged 65-70 years                                                                   | Kazakh subjects                          | 117 | 181.4±7.17  | 18.9±0.8   |           |  | NR                                                                                                                                                                     |
|                                   |                  |                                                                                   |                    |                                                                                                          | Han subjects                             | 50  | 194.1±10.73 | 36.5±1.6   |           |  |                                                                                                                                                                        |
| Xie et al, 2001 <sup>29</sup>     | Cross-sectional  | Farming village in Hubai Province (North China)                                   | Mar 1995           | Mean age 40.0 years (SD=16.5) in men, 36.7 years (SD=15.7) in women                                      | Men                                      | 179 | 152.9±4.67  | 28.7±1.29  | 6.6±0.33  |  | Not assessed                                                                                                                                                           |
|                                   |                  |                                                                                   |                    |                                                                                                          | Women                                    | 153 | 123.3±4.79  | 23.7±1.16  | 5.1±0.23  |  |                                                                                                                                                                        |
| Yamori et al, 2002 <sup>30</sup>  | Cross-sectional  | Daping District of Chongqing                                                      | Oct 2000           | Extension of WHO-CARDIAC: men aged 43-55 years                                                           |                                          | 118 |             | 140.7±5.39 | 30.9±1    |  | NR                                                                                                                                                                     |
| Zhao et al, 2004 <sup>31</sup>    | Cross-sectional  | Pinggu County, Beijing; Yu County, Shanxi Province; Wuming County, Guangxi Zhuang | Sep 1997- Jan 1998 | INTERMAP: rural populations, mean age 48.9 years (SD=5.8) in the North, 49.1 years (SD=5.7) in the South | Beijing (North)                          | 272 | 275±5.46    | 37±0.72    |           |  | Specimens rejected if collection time fell outside the range 22-26 h, if the participant responded that collection was incomplete, or he/she had lost 'more than a few |
|                                   |                  |                                                                                   |                    |                                                                                                          | Shanxi (North)                           | 289 | 268±5       | 37.1±0.66  |           |  |                                                                                                                                                                        |
|                                   |                  |                                                                                   |                    |                                                                                                          | North                                    | 561 | 271±3.72    | 37.1±0.49  |           |  |                                                                                                                                                                        |
|                                   |                  |                                                                                   |                    |                                                                                                          | Guangxi (South)                          | 278 | 139±3.42    | 40.6±0.88  |           |  |                                                                                                                                                                        |

|                                  |                             |                                                                                    |                   |                                                                                                       |                                      |      |              |            |           |  |                                             |                                                                                                                    |
|----------------------------------|-----------------------------|------------------------------------------------------------------------------------|-------------------|-------------------------------------------------------------------------------------------------------|--------------------------------------|------|--------------|------------|-----------|--|---------------------------------------------|--------------------------------------------------------------------------------------------------------------------|
|                                  |                             | Autonomous Region                                                                  |                   |                                                                                                       |                                      |      |              |            |           |  |                                             | drops' of urine, or if total volume was less than 250 ml. The participant was then asked to repeat the collection. |
| Cheung et al, 2004 <sup>32</sup> | Cross-sectional             | Hong Kong                                                                          | NR                | Mean age 40.3 years (SD=12.7) in normotensive subjects, 51.0 years (SD=12.2) in hypertensive subjects | All subjects                         | 190  | 167.4±4.85   | 45.7±1.29  |           |  | Not assessed                                |                                                                                                                    |
|                                  |                             |                                                                                    |                   |                                                                                                       | Normotensive                         | 151  | 166.6±5.57   | 46.2±1.46  |           |  |                                             |                                                                                                                    |
|                                  |                             |                                                                                    |                   |                                                                                                       | Hypertensive                         | 39   | 170.6±9.8    | 43.9±2.69  |           |  |                                             |                                                                                                                    |
| Zhou et al, 2009 <sup>33</sup>   | Randomised controlled trial | Rural Hedong District, Tianjin                                                     | Sep 2003-May 2004 | Rural communities, participants aged 50-80 years                                                      | Hypertensives on compound ion salt   | 62   | 238±4.89     | 23.5±0.91  |           |  | NR                                          |                                                                                                                    |
|                                  |                             |                                                                                    |                   |                                                                                                       | Hyper-tensive on normal salt         | 64   | 241±5.78     | 24.6±1.02  |           |  |                                             |                                                                                                                    |
|                                  |                             |                                                                                    |                   |                                                                                                       | Normotensives on compound ion salt   | 57   | 237±6.62     | 22.8±0.95  |           |  |                                             |                                                                                                                    |
|                                  |                             |                                                                                    |                   |                                                                                                       | Normotensives on normal salt         | 65   | 239±4.54     | 23.7±0.97  |           |  |                                             |                                                                                                                    |
| He et al, 2009 <sup>34</sup>     | Crossover trial             | Rural areas in north China: Hebei, Henan, Shandong, Shaanxi, and Jiangsu provinces | Oct 2003-Jul 2005 | GenSalt: mean age 39.3 years (SD=9.6) in men, 38.1 years (SD=9.4) in women                            | Men                                  | 1010 | 251.1±2.2    | 37.2±0.3   | 9.31±0.07 |  | NR                                          |                                                                                                                    |
|                                  |                             |                                                                                    |                   |                                                                                                       | Women                                | 896  | 232.7±2.06   | 36.4±0.33  | 7.83±0.06 |  |                                             |                                                                                                                    |
| Zhang et al, 2011 <sup>35</sup>  | Pre-post trial              | Laiwu city, Shandong Province                                                      | 2010              | Rural communities, participants aged 30-60 years                                                      | High blood pressure                  | 195  | 204±4.44     | 24.8±0.79  |           |  | NR                                          |                                                                                                                    |
|                                  |                             |                                                                                    |                   |                                                                                                       | Non-high blood pressure              | 216  | 184.6±3.86   | 23.7±0.65  |           |  |                                             |                                                                                                                    |
| Liu et al, 2013 <sup>36</sup>    | Pre-post trial              | Jinxi Second Community Service                                                     | NR                | Hypertensives Han people, mean                                                                        | Salt-sensitive hypertensive patients | 63   | 179.47±11.04 | 47.98±2.47 |           |  | If incomplete collection, participant asked |                                                                                                                    |

|                                |                             |                                                                      |                     |                                                                                                                                |                                                               |      |              |            |  |         |                                                |
|--------------------------------|-----------------------------|----------------------------------------------------------------------|---------------------|--------------------------------------------------------------------------------------------------------------------------------|---------------------------------------------------------------|------|--------------|------------|--|---------|------------------------------------------------|
|                                |                             | Centre in Chaoyang District, Beijing                                 |                     | age 57.5 years (SD=8.5)                                                                                                        | Non-salt-sensitive hypertensive patients                      | 279  | 196.84±5.48  | 48.13±1.30 |  |         | to re-collect the next day                     |
| Gu et al, 2013 <sup>37</sup>   | Crossover trial             | 18 of the 45 GenSalt study villages in rural areas in northern China | Aug 2008- Nov 2009  | Follow-up to the GenSalt study: mean age 44.3 years (SD=8.7)                                                                   |                                                               | 487  | 249±3.4      | 40±0.61    |  |         | NR                                             |
| Chen et al, 2013 <sup>38</sup> | Randomised controlled trial | Two villages in the suburban area of Beijing                         | Jun 2012 - Jan 2013 | Mean age 54.69 years (SD=12.30) in intervention group, 51.90 years (SD=13.54) in control group                                 | Intervention group (baseline)                                 | 99   | 204.28±10.65 |            |  |         | Not assessed                                   |
|                                |                             |                                                                      |                     |                                                                                                                                | Control group (baseline)                                      | 74   | 231.34±11.24 |            |  |         |                                                |
| Chen et al, 2014 <sup>39</sup> | Cross-sectional             | Xicheng and Shunyi districts in Beijing                              | Jul 2012            | Mean age 57.7 years (SD=13.8)                                                                                                  | Urban respondents                                             | 396  | 113.7±3.65   |            |  |         | NR                                             |
|                                |                             |                                                                      |                     |                                                                                                                                | Rural respondents                                             | 403  | 212.18±5.23  |            |  |         |                                                |
| Hu et al, 2014 <sup>40</sup>   | Cross-sectional             | JingNing County                                                      | 2003-09             | Primary study: mean age 46.5 years (SD=15.9) in men, 43.5 years (SD=15.0) in women; age of validation study's participants NR. | Primary study - Gene and polymorphism rs3811544 (NPPC), CC    | 902  | 178.4±2.83   | 24.8±0.34  |  | 1240±1  | Urinary samples less than 600 mL were excluded |
|                                |                             |                                                                      |                     |                                                                                                                                | Primary study - Gene and polymorphism rs3811544 (NPPC), CC±TT | 49   | 205.8±11.6   | 26.6±1.38  |  | 1390±11 |                                                |
|                                |                             |                                                                      |                     |                                                                                                                                | Validation study - Gene and polymorphism rs3811544 (NPPC), CC | 1273 | 140.2±2.05   | 23.4±0.35  |  | 1110±0  |                                                |
|                                |                             |                                                                      |                     |                                                                                                                                | Validation study - Gene                                       | 82   | 145.1±8.71   | 23±1.5     |  | 1160±7  |                                                |

|                                |                 |                                                                       |              |                                                                                                             | and polymorphism rs3811544 (NPPC), CC±TT |     |             |           |           |         |                                                                                                                                                                                                                                |
|--------------------------------|-----------------|-----------------------------------------------------------------------|--------------|-------------------------------------------------------------------------------------------------------------|------------------------------------------|-----|-------------|-----------|-----------|---------|--------------------------------------------------------------------------------------------------------------------------------------------------------------------------------------------------------------------------------|
| Xu et al, 2014 <sup>41</sup>   | Cross-sectional | Yantai, Shandong Province                                             | Jul 2011     | SMASH pilot: mean age 42.3 years (SD=13.5)                                                                  | Men                                      | 98  | 218.3±8.22  | 45.9±1.81 | 11±0.23   | 1442±42 | Creatinine [mg/day]/body weight [kg] of 14.4 to 33.6 in men and 10.8 to 25.2 in women were classified as indicating an Acceptable 24h urine collection                                                                         |
|                                |                 |                                                                       |              |                                                                                                             | Women                                    | 93  | 183.8±7.24  | 47.7±2.87 | 7.6±0.17  |         |                                                                                                                                                                                                                                |
|                                |                 |                                                                       |              |                                                                                                             | Total                                    | 191 | 201.5±5.62  | 46.8±1.68 | 9.4±0.19  |         |                                                                                                                                                                                                                                |
| Zhou et al, 2014 <sup>42</sup> | Crossover trial | NR                                                                    | NR           | Mean age 27.3 years (SD=0.84)                                                                               | Day 3 (baseline)                         | 23  | 161±10.8    | 37.3±2.93 | 9.73±0.99 | 1898±38 | NR                                                                                                                                                                                                                             |
| Liu et al, 2014 <sup>43</sup>  | Cross-sectional | Hong Kong                                                             | 2011         | Postmenopausal women with prehypertension aged 48-70 years                                                  | Sensitivity analyses                     | 569 | 132.24±2.12 | 57.7±0.83 | 8.5±0.11  | 2082±27 | Sensitivity analyses excluded subjects with missed voids and subjects with 30% or higher coefficients of variation in weight-corrected creatinine (24h creatinine excretion in milligrams divided by body weight in kilograms) |
| Ge et al, 2015 <sup>44</sup>   | Cross-sectional | Shandong (Gaomi and Fushan sites) and Jiangsu (Xinyi and Ganyu sites) | Jun-Jul 2011 | SMASH participants: mean age 39.7 years (SD=13.9) in those without metabolic syndrome, 46.1 years (SD=13.0) | Without metabolic syndrome               | 143 | 224.8±2.12  | 40.4±0.52 |           |         |                                                                                                                                                                                                                                |
|                                |                 |                                                                       |              |                                                                                                             | With metabolic syndrome                  | 471 | 240.4±4.05  | 41.9±0.9  |           |         |                                                                                                                                                                                                                                |

|                                         |                             |                                                                            |                   |                                                                                                                                |                                        |      |              |            |           |          |                                                                                                                                                                                 |
|-----------------------------------------|-----------------------------|----------------------------------------------------------------------------|-------------------|--------------------------------------------------------------------------------------------------------------------------------|----------------------------------------|------|--------------|------------|-----------|----------|---------------------------------------------------------------------------------------------------------------------------------------------------------------------------------|
|                                         |                             |                                                                            |                   | in those with metabolic syndrome                                                                                               |                                        |      |              |            |           |          |                                                                                                                                                                                 |
| Ge et al, 2015 <sup>45</sup>            | Cross-sectional             | Gaomi and Fushan in Shandong Province, Xinyi and Ganyu in Jiangsu Province | 2013              | SMASH: mean age 42.1 years (SD=13.4)                                                                                           | Total                                  | 2281 | 166.9±0.54   | 25.3±0.07  |           |          | Incomplete urine collection defined as either a 24h urinary volume less than 500 ml or a 24h urinary creatinine volume that was ± 2 SD outside of the sex-specific mean         |
|                                         |                             |                                                                            |                   |                                                                                                                                | Male                                   | 1135 | 172.4±0.86   | 25.3±0.11  |           |          |                                                                                                                                                                                 |
|                                         |                             |                                                                            |                   |                                                                                                                                | Female                                 | 1146 | 161.6±0.65   | 25.3±0.09  |           |          |                                                                                                                                                                                 |
|                                         |                             |                                                                            |                   |                                                                                                                                | Fushan                                 | 551  | 170.4±1.57   | 23.8±0.18  |           |          |                                                                                                                                                                                 |
|                                         |                             |                                                                            |                   |                                                                                                                                | Gaomi                                  | 568  | 138.7±0.99   | 23±0.12    |           |          |                                                                                                                                                                                 |
|                                         |                             |                                                                            |                   |                                                                                                                                | Xinyi                                  | 598  | 178.8±0.75   | 26.2±0.09  |           |          |                                                                                                                                                                                 |
|                                         |                             |                                                                            |                   |                                                                                                                                | Ganyu                                  | 564  | 180.8±0.9    | 28.2±0.12  |           |          |                                                                                                                                                                                 |
| Wang et al, 2015 <sup>46</sup>          | Crossover trial             | Northern China                                                             | NR                | Rural community, mean age 49.0 years (SD=7.9)                                                                                  | Baseline                               | 48   | 173.9±9.69   | 47.4±2.9   |           |          | NR                                                                                                                                                                              |
| Zhang et al, 2015 [adults] <sup>8</sup> | Cross-sectional             | Huairou District, Beijing                                                  | Apr 2012          | Mean age 10.0 years (SD=3.2) in children, 42.3 years (SD=9.4) in adults                                                        | Adults                                 | 10   | 330.4±17.27  | 68.9±5.98  | 13.8±2.9  | 2079±167 | NR                                                                                                                                                                              |
| He et al, 2015 [adults] <sup>10</sup>   | Randomised controlled trial | Primary schools in urban Changzhi, northern China                          | May 2013-Dec 2013 | School-EduSalt: fifth-graders (mean age 10.1 years, SD=0.5) and adult members of their families (mean age 43.8 years, SD=12.2) | Control group - adults (baseline)      | 273  | 215.1±6.7    | 36±1       | 9.5±0.2   | 1636±61  | Participant asked to do another 24h collection if missed one or more urine voids or spilt >10% of the total 24h urine volume                                                    |
|                                         |                             |                                                                            |                   |                                                                                                                                | Intervention group - adults (baseline) | 275  | 167.13±11.46 | 45.41±5.09 | 9.85±0.72 | 1200±27  |                                                                                                                                                                                 |
| Han et al, 2015 <sup>47</sup>           | Cross-sectional             | Department of Hypertension at Peking University People's Hospital, Beijing | Mar 2010-Feb 2012 | Regular hypertensive visitors, mean age 58.4 years (SD=14.5)                                                                   |                                        | 222  | 147.9±4.15   |            | 11.0±0.04 |          | Complete 24-hour urine collection was defined as urine volume ≥500 ml as measured by a technician, recorded collection of ≥20 hours, and reports of spilling urine or missing a |



|                                    |                             |                                                                                   |                   |                                                  |                  |      |             |            |  |  |                                                                                                                                                                                                                                                                                                                                                            |
|------------------------------------|-----------------------------|-----------------------------------------------------------------------------------|-------------------|--------------------------------------------------|------------------|------|-------------|------------|--|--|------------------------------------------------------------------------------------------------------------------------------------------------------------------------------------------------------------------------------------------------------------------------------------------------------------------------------------------------------------|
|                                    |                             |                                                                                   |                   |                                                  |                  |      |             |            |  |  | void no more than once in 24 hours                                                                                                                                                                                                                                                                                                                         |
| Wang et al, 2016 <sup>48</sup>     | Randomised controlled trial | Northern rural China: Hebei, Liaoning, Shanxi, Shaanxi, Ningxia Autonomous Region | May 2011-Nov 2012 | CRHI-SRS controls: mean age 53.9 years (SD=14.1) | Controls         | 928  | 250.5±3.08  | 45.4±0.62  |  |  | Urine collections excluded if participants reported missing more than one void, a collection period less than 22 h or longer than 26 h, suspected spillage of more than 10 % of the total volume, volume < 500 ml or > 6000 ml, urinary creatinine < 4.0 mmol/day or > 25 mmol/day for women or urinary creatinine < 6.0 mmol/day or > 30 mmol/day for men |
| Zhang et al, 2016 <sup>49</sup>    | Crossover trial             | Northern China                                                                    | NR                | Rural community, mean age 50.6 years (SD=2.1)    | Baseline         | 38   | 175.8±1.80  |            |  |  | NR                                                                                                                                                                                                                                                                                                                                                         |
| Yongqing et al, 2016 <sup>50</sup> | Cross-sectional             | Jiangsu Province                                                                  | Dec 2013-May 2014 | Mean age 41.55 years (SD=13.797)                 | Male             | 1069 | 196.36±2.21 | 28.37±0.31 |  |  | Assessed based on creatinine excretion                                                                                                                                                                                                                                                                                                                     |
|                                    |                             |                                                                                   |                   |                                                  | Female           | 1133 | 180.47±1.95 | 27.64±0.27 |  |  |                                                                                                                                                                                                                                                                                                                                                            |
|                                    |                             |                                                                                   |                   |                                                  | Urban            | 823  | 205.23±2.49 | 29.97±0.35 |  |  |                                                                                                                                                                                                                                                                                                                                                            |
|                                    |                             |                                                                                   |                   |                                                  | Rural            | 1379 | 178.02±1.78 | 26.81±0.24 |  |  |                                                                                                                                                                                                                                                                                                                                                            |
|                                    |                             |                                                                                   |                   |                                                  | Aged 18-34 years | 625  | 189.55±2.8  | 26.47±0.35 |  |  |                                                                                                                                                                                                                                                                                                                                                            |
|                                    |                             |                                                                                   |                   |                                                  | Aged 35-49 years | 731  | 190.91±2.65 | 28.34±0.37 |  |  |                                                                                                                                                                                                                                                                                                                                                            |
|                                    |                             |                                                                                   |                   |                                                  | Aged 50-59 years | 846  | 184.82±2.31 | 28.81±0.33 |  |  |                                                                                                                                                                                                                                                                                                                                                            |

|                                 |                 |                                        |                   |                                                                                                                                                                 |                                        |          |              |            |           |         |                                                                                                 |
|---------------------------------|-----------------|----------------------------------------|-------------------|-----------------------------------------------------------------------------------------------------------------------------------------------------------------|----------------------------------------|----------|--------------|------------|-----------|---------|-------------------------------------------------------------------------------------------------|
|                                 |                 |                                        |                   |                                                                                                                                                                 | Total                                  | 220<br>2 | 188.19±1.48  | 27.99±0.2  |           |         |                                                                                                 |
| Peng et al, 2016 <sup>51</sup>  | Cross-sectional | Shanxi Province                        | NR                | PURE substudy: mean age 53.16 years, SD=8.09                                                                                                                    |                                        | 116      | 157.93±4.65  | 27.59±1.09 |           | 1869±76 | Participants with incomplete urine collections or missing data were excluded from this analysis |
| Zheng et al, 2017 <sup>52</sup> | Crossover trial | Northern China                         | NR                | Rural community, mean age 52.2 years (SD=1.8) in salt-sensitive subjects, 50.8 years (SD=2.4) in salt-resistant subjects                                        | Salt-sensitive subjects (baseline)     | 13       | 156.2±13.9   | 29±2.4     |           |         | NR                                                                                              |
|                                 |                 |                                        |                   |                                                                                                                                                                 | Salt-resistant subjects (baseline)     | 25       | 175.3±12.9   | 32±1.6     |           |         |                                                                                                 |
| Guo et al, 2017 <sup>53</sup>   | Crossover trial | Rural area of Shaanxi Province         | Jul-Aug 2013      | Mean age 51.3 years (SD=2.5) in salt-sensitive subjects, 49.6 years (SD=1.4) in non-salt-sensitive subjects                                                     | Salt-sensitive subjects (baseline)     | 14       | 167.13±11.46 | 45.41±5.09 | 9.85±0.72 | 1200±27 | NR                                                                                              |
|                                 |                 |                                        |                   |                                                                                                                                                                 | Non-salt-sensitive subjects (baseline) | 35       | 177.07±12.53 | 48.04±3.56 | 9.51±0.49 | 1160±12 |                                                                                                 |
|                                 |                 |                                        |                   |                                                                                                                                                                 | Baseline                               | 38       | 180.53±8.47  | 40.91±0.85 | 9.93±0.18 | 1445±32 |                                                                                                 |
| Li et al, 2017 <sup>54</sup>    | Cross-sectional | Shenyang, Jinan, Chengdu, Chongqing    | NR                | Mean age 39.0 years (SD=10.5) in low-salt preference group, 39.7 years (SD=9.8) medium-salt preference group, 44.0 years (SD=8.4) in high-salt preference group | Low-Salt Preference Group              | 416      | 191.4±4.03   |            |           |         | NR                                                                                              |
|                                 |                 |                                        |                   |                                                                                                                                                                 | Medium-Salt Preference Group           | 94       | 221.9±9.33   |            |           |         |                                                                                                 |
|                                 |                 |                                        |                   |                                                                                                                                                                 | High-Salt Preference Group             | 96       | 243.2±8.18   |            |           |         |                                                                                                 |
| Deng et al, 2017 <sup>55</sup>  | Cross-sectional | Shanghai, Chongqing, Harbin, Shaoyang, | May 2013-Jul 2014 | Han adults: mean age 48.86 years (SD=16.25) in the standard weight                                                                                              | Standard weight adults                 | 376      | 207.93±52.97 | 41.41±2.82 | 9.46±0.55 | 1296±87 | Exclusion: incomplete urine samples (urine                                                      |
|                                 |                 |                                        |                   |                                                                                                                                                                 | Under-weight adults                    | 24       | 194.79±6.75  | 47.54±1.89 | 9.95±0.23 | 1523±55 |                                                                                                 |

|                                |                 |                                                              |                   |                                                                                                                                                   |                   |                         |              |            |            |          |                                                                                                                                                                                                                                                                                         |
|--------------------------------|-----------------|--------------------------------------------------------------|-------------------|---------------------------------------------------------------------------------------------------------------------------------------------------|-------------------|-------------------------|--------------|------------|------------|----------|-----------------------------------------------------------------------------------------------------------------------------------------------------------------------------------------------------------------------------------------------------------------------------------------|
|                                |                 | Lanzhou, Changshi                                            |                   | group, 53.96 years (SD=19.28) in the underweight group, 52.14 years (SD=14.25) in the overweight group, 50.03 years (SD=12.84) in the obese group | Overweight adults | 149                     | 192.66±11.96 | 45.66±3.32 | 10.46±0.45 | 1451±114 | creatinine < 600 µg/24 h)                                                                                                                                                                                                                                                               |
|                                |                 |                                                              |                   |                                                                                                                                                   | Obese adults      | 35                      | 193.4±6.7    | 36.1±1     | 9.3±0.2    | 1577±61  |                                                                                                                                                                                                                                                                                         |
| Ma et al, 2017 <sup>56</sup>   | Cross-sectional | Rural areas of Chenggu and Qishan counties, Shaanxi Province | Feb 2015-Feb 2016 | SSaSS substudy: with elevated risk of stroke, mean age 67.5 years (SD=6.8)                                                                        |                   | 365                     | 122.4±2.51   | 24.7±0.65  | 6.43±0.14  | 1419±29  | Excluded from analysis if collection time fell outside the range of 22–26 h, total 24h urine volume was less than 500 mL or greater than 6000 mL, and 24h creatinine excretion was less than 3 mmol or greater than 25 mmol in women or less than 6 mmol or greater than 30 mmol in men |
| Zhou et al, 2017 <sup>57</sup> | Cross-sectional | Dexing City, Jiangsi Province                                | NR                | Mean age 51.1 years (SD=8.2)                                                                                                                      |                   | 141                     | 155.4±3.6    | 28.1±0.83  | 5.6±0.19   | 1487±56  | Excluded if an incomplete 24h urine collection was reported, the collection time fell outside the range of 22–26 h, or the total volume of urine was <500 mL                                                                                                                            |
| Dong et al, 2017 <sup>58</sup> | Cross-sectional | Chenghai district, Longhu district and                       | Mar-Nov 2016      | Mean age 56.3 years (SD=17.4)                                                                                                                     | Male              | 128<br>.12<br>±8.<br>77 | 43.21±4.22   | 8.53±0.36  | 1792±115   |          | Excluded: urine volume less than 500ml/24h, missed 1 void, 24h urine                                                                                                                                                                                                                    |

|                                |                 |                                               |    |                                                |          |                          |              |            |         |    |                                                                                                                                                 |
|--------------------------------|-----------------|-----------------------------------------------|----|------------------------------------------------|----------|--------------------------|--------------|------------|---------|----|-------------------------------------------------------------------------------------------------------------------------------------------------|
|                                |                 | Jinping district in Shantou city              |    |                                                | Female   | 131<br>.77<br>±4.<br>94  | 48.09±2.08   | 7.16±0.21  | 1663±51 |    | creatinine <4 mmol (in women) or <6 mmol (in men)                                                                                               |
| Wang et al, 2018 <sup>59</sup> | Crossover trial | Liquan and Lantian Counties, Shaanxi Province | NR | Mean age 50.5 years (SD=1.1)                   | Baseline | 90                       | 172.1±7.6    | 37.9±2     |         |    | Any urine collection less than 500 mL or with a creatinine excretion lower than the population mean minus two standard deviations was discarded |
| Hu et al, 2018 <sup>60</sup>   | Crossover trial | Lantian, Shaanxi Province                     | NR | Rural community, mean age 51.2 years (SD=12.4) | Baseline | 44                       | 168.98±11.61 | 27.79±1.61 |         |    | NR                                                                                                                                              |
| Duan et al, 2018 <sup>61</sup> | Cross-sectional | Cities of Tianjin and Luoyang                 | NR | Healthy lactating women aged 20-39 years       | 30       | 160<br>.08<br>±11<br>.85 |              |            |         | NR | Duan et al, 2018 <sup>61</sup>                                                                                                                  |

NR: not reported; SD: standard deviation; SE: standard error.

CRHI-SRS: China Rural Health Initiative Sodium Reduction Study; GenSalt: Genetic Epidemiology Network of Salt Sensitivity; INTERMAP: International Study of Macro-and Micro-Nutrients; PURE: Prospective Urban and Rural Epidemiological; School Edu-Salt: School-based Education Program to Reduce Salt Intake in Children and Their Families; SMASH: Shandong and Ministry of Health Action on Salt and Hypertension; SSaSS: Salt Substitute and Stroke Study; WHO CARDIAC: World Health Organization Cardiovascular Diseases and Alimentary Comparison.

**Table S2. Mean sodium excretion (mmol/24h) for subgroups of studies – sensitivity analyses**

|                                        | <b>Base analysis</b>       | <b>Excluding hospital-based studies</b> | <b>Excluding hypertensive participants</b> | <b>Excluding ethnic minorities</b> | <b>Placing Tibet in southern China</b> |
|----------------------------------------|----------------------------|-----------------------------------------|--------------------------------------------|------------------------------------|----------------------------------------|
| <b>Age groups</b>                      |                            |                                         |                                            |                                    |                                        |
| - 3–6 years                            | 86.99<br>(69.88–104.1)     | 86.99<br>(69.88–104.1)                  | 86.99<br>(69.88–104.1)                     | 86.99<br>(69.88–104.1)             | –                                      |
| - 6–16 years                           | 151.09<br>(131.55–170.63)  | 144.46<br>(123.53–165.39)               | 146.99<br>(128.51–165.46)                  | 145.58<br>(126.41–164.76)          | –                                      |
| - >16 years                            | 189.07<br>(182.14–195.99)  | 187.28<br>(180.24–194.33)               | 187.01<br>(180.26–193.75)                  | 190.58<br>(183.61–197.56)          | –                                      |
| <b>Sex</b>                             |                            |                                         |                                            |                                    |                                        |
| - Female                               | 181.54<br>(167.10– 195.99) | 178.39<br>(164.50– 192.29)              | 166.08<br>(152.65– 179.51)                 | 181.54<br>(167.10– 195.99)         | –                                      |
| - Male                                 | 194.76<br>(179.27– 210.25) | 187.91<br>(172.11– 203.70)              | 181.57<br>(166.97– 196.17)                 | 202.57<br>(187.40– 217.74)         | –                                      |
| <b>Geographical location</b>           |                            |                                         |                                            |                                    |                                        |
| - Northern China                       | 205.81<br>(193.15– 218.46) | 202.33<br>(189.61– 215.06)              | 208.05<br>(195.18– 220.92)                 | 205.43<br>(192.75– 218.11)         | 205.13<br>(192.21– 218.04)             |
| - Southern China                       | 156.97<br>(145.96– 167.99) | 157.54<br>(144.90– 170.18)              | 157.92<br>(146.73– 169.10)                 | 158.84<br>(147.94– 169.75)         | 161.45<br>(150.52– 172.39)             |
| <b>Rigour of 24h urine collection</b>  |                            |                                         |                                            |                                    |                                        |
| - Completeness not assessed / reported | 188.43<br>(172.96– 203.90) | 186.15<br>(170.41– 201.89)              | 181.95<br>(168.70– 195.20)                 | 187.88<br>(172.34– 203.43)         | –                                      |
| - Completeness assessed                | 188.04<br>(175.56– 200.52) | 185.50<br>(172.41– 198.59)              | 193.42<br>(180.78– 206.06)                 | 189.09<br>(176.71– 201.48)         | –                                      |

**Table S2 (continued)**

|                                    | <b>Base analysis</b>       | <b>Excluding hospital-based studies</b> | <b>Excluding hypertensive participants</b> | <b>Excluding ethnic minorities</b> | <b>Placing Tibet in southern China</b> |
|------------------------------------|----------------------------|-----------------------------------------|--------------------------------------------|------------------------------------|----------------------------------------|
| <b>Study year (whole of China)</b> |                            |                                         |                                            |                                    |                                        |
| - 1980s                            | 192.84<br>(159.15– 226.54) | 179.06<br>(152.46– 205.66)              | 192.84<br>(159.15– 226.54)                 | 194.76<br>(166.82– 222.70)         | –                                      |
| - 1990s                            | 191.20<br>(167.79– 214.62) | 188.16<br>(165.10– 211.21)              | 190.48<br>(165.47– 215.49)                 | 191.65<br>(167.80– 215.50)         | –                                      |
| - 2000s                            | 201.07<br>(164.10– 238.04) | 201.07<br>(164.10– 238.04)              | 178.23<br>(125.28– 231.18)                 | 201.07<br>(164.10– 238.04)         | –                                      |
| - 2010s                            | 181.51<br>(169.93– 193.09) | 181.51<br>(169.93– 193.09)              | 186.80<br>(176.90– 196.70)                 | 181.51<br>(169.93– 193.09)         | –                                      |
| <b>Study year (northern China)</b> |                            |                                         |                                            |                                    |                                        |
| - 1980s                            | 222.49<br>(210.68– 234.30) | 217.69<br>(205.53– 229.85)              | 222.49<br>(210.68– 234.30)                 | 218.60<br>(205.45– 231.74)         | 222.49<br>(210.68– 234.30)             |
| - 1990s                            | 228.97<br>(211.68– 246.25) | 223.90<br>(203.02– 244.77)              | 230.94<br>(213.46– 248.42)                 | 232.46<br>(215.29– 249.63)         | 225.89<br>(207.43– 244.35)             |
| - 2000s                            | 242.95<br>(238.85– 247.06) | 242.95<br>(238.85– 247.06)              | 238.36<br>(233.17– 243.55)                 | 242.95<br>(238.85– 247.06)         | 242.95<br>(238.85– 247.06)             |
| - 2010s                            | 194.53<br>(187.35– 201.71) | 194.53<br>(187.35– 201.71)              | 197.56<br>(190.39– 204.72)                 | 194.53<br>(187.35– 201.71)         | 194.53<br>(187.35– 201.71)             |
| <b>Study year (southern China)</b> |                            |                                         |                                            |                                    |                                        |
| - 1980s                            | 152.51<br>(138.05– 166.97) | 152.55<br>(134.59– 170.51)              | 152.51<br>(138.05– 166.97)                 | 168.16<br>(158.35– 177.98)         | 152.51<br>(138.05– 166.97)             |
| - 1990s                            | 150.36<br>(140.88– 159.83) | 150.82<br>(141.21– 160.42)              | 149.34<br>(139.99– 158.70)                 | 150.36<br>(140.88– 159.83)         | 155.81<br>(145.13– 166.48)             |
| - 2000s                            | 195.99<br>(169.50– 222.49) | 195.99<br>(169.50– 222.49)              | 167.00<br>(153.29– 180.70)                 | 195.99<br>(169.50– 222.49)         | 195.99<br>(169.50– 222.49)             |
| - 2010s                            | 178.15<br>(169.47– 186.82) | 178.15<br>(169.47– 186.82)              | 180.13<br>(173.34– 186.92)                 | 178.15<br>(169.47– 186.82)         | 178.15<br>(169.47– 186.82)             |

**Table S3. Mean potassium excretion (mmol/24h) for subgroups of studies – sensitivity analyses**

|                                        | <b>Base analysis</b>      | <b>Excluding hospital-based studies</b> | <b>Excluding hypertensive participants</b> | <b>Excluding ethnic minorities</b> | <b>Placing Tibet in southern China</b> |
|----------------------------------------|---------------------------|-----------------------------------------|--------------------------------------------|------------------------------------|----------------------------------------|
| <b>Age groups</b>                      |                           |                                         |                                            |                                    |                                        |
| - 3–6 years                            | 14.65<br>(11.1–18.2)      | 14.65<br>(11.1–18.2)                    | 14.65<br>(11.1–18.2)                       | 14.65<br>(11.1–18.2)               | –                                      |
| - 6–16 years                           | 25.23<br>(22.37–28.1)     | 26.03<br>(22.08–29.99)                  | 26.03<br>(22.08–29.99)                     | 24.35<br>(21.52–27.18)             | –                                      |
| - >16 years                            | 36.35<br>(35.11 to 37.59) | 35.97<br>(34.73 to 37.22)               | 36.02<br>(34.83 to 37.22)                  | 36.09<br>(34.82 to 37.36)          | –                                      |
| <b>Sex</b>                             |                           |                                         |                                            |                                    |                                        |
| - Female                               | 36.76<br>(33.37–40.15)    | 36.01<br>(32.69–39.33)                  | 35.33<br>(32.51–38.16)                     | 36.76<br>(33.37–40.15)             | –                                      |
| - Male                                 | 38.26<br>(35.65–40.86)    | 37.95<br>(35.35–40.56)                  | 38.65<br>(36.05–41.26)                     | 36.65<br>(33.88–39.41)             | –                                      |
| <b>Geographical location</b>           |                           |                                         |                                            |                                    |                                        |
| - Northern China                       | 38.19<br>(35.16–41.21)    | 38.00<br>(34.90–41.10)                  | 38.42<br>(34.89–41.95)                     | 38.62<br>(35.60–41.63)             | 38.14<br>(35.06–41.21)                 |
| - Southern China                       | 36.66<br>(33.01–40.32)    | 36.67<br>(32.53–40.81)                  | 35.74<br>(32.78–38.70)                     | 36.13<br>(32.56–39.71)             | 36.80<br>(33.23–40.37)                 |
| <b>Rigour of 24h urine collection</b>  |                           |                                         |                                            |                                    |                                        |
| - Completeness not assessed / reported | 37.13<br>(33.53–40.73)    | 36.94<br>(33.24–40.63)                  | 37.53<br>(33.02–42.03)                     | 37.83<br>(34.24–41.41)             | –                                      |
| - Completeness assessed                | 37.45<br>(34.55–40.34)    | 37.38<br>(34.22–40.53)                  | 36.65<br>(34.01–39.29)                     | 37.11<br>(34.25–39.97)             | –                                      |

**Table S3 (continued)**

|                                    | <b>Base analysis</b>    | <b>Excluding hospital-based studies</b> | <b>Excluding hypertensive participants</b> | <b>Excluding ethnic minorities</b> | <b>Placing Tibet in southern China</b> |
|------------------------------------|-------------------------|-----------------------------------------|--------------------------------------------|------------------------------------|----------------------------------------|
| <b>Study year (whole of China)</b> |                         |                                         |                                            |                                    |                                        |
| - 1980s                            | 36.98<br>(33.86– 40.11) | 40.45<br>(33.02– 47.88)                 | 36.98<br>(33.86– 40.11)                    | 38.26<br>(33.82– 42.70)            | –                                      |
| - 1990s                            | 37.34<br>(33.40– 41.27) | 36.78<br>(32.83– 40.74)                 | 37.83<br>(33.62– 42.04)                    | 37.54<br>(33.71– 41.38)            | –                                      |
| - 2000s                            | 33.52<br>(26.95– 40.08) | 33.52<br>(26.95– 40.08)                 | 31.05<br>(23.69– 38.41)                    | 33.52<br>(26.95– 40.08)            | –                                      |
| - 2010s                            | 37.96<br>(34.04– 41.88) | 37.96<br>(34.04– 41.88)                 | 36.82<br>(33.33– 40.32)                    | 37.96<br>(34.04– 41.88)            | –                                      |
| <b>Study year (northern China)</b> |                         |                                         |                                            |                                    |                                        |
| - 1980s                            | 39.27<br>(37.16– 41.38) | 39.49<br>(37.22– 41.76)                 | 39.27<br>(37.16– 41.38)                    | 39.42<br>(37.01– 41.82)            | 39.27<br>(37.16– 41.38)                |
| - 1990s                            | 38.53<br>(34.80– 42.26) | 37.14<br>(33.09– 41.20)                 | 38.72<br>(34.74– 42.70)                    | 39.93<br>(37.39– 42.47)            | 38.45<br>(34.58– 42.32)                |
| - 2000s                            | 36.17<br>(33.74– 38.61) | 36.17<br>(33.74– 38.61)                 | 23.24<br>(22.30– 24.18)                    | 36.17<br>(33.74– 38.61)            | 36.17<br>(33.74– 38.61)                |
| - 2010s                            | 38.82<br>(37.26– 40.38) | 38.82<br>(37.26– 40.38)                 | 38.97<br>(37.39– 40.54)                    | 38.82<br>(37.26– 40.38)            | 38.82<br>(37.26– 40.38)                |
| <b>Study year (southern China)</b> |                         |                                         |                                            |                                    |                                        |
| - 1980s                            | 34.33<br>(31.86– 36.81) | 33.94<br>(31.57– 36.30)                 | 34.33<br>(31.86– 36.81)                    | 30.46<br>(28.36– 32.57)            | 34.33<br>(31.86– 36.81)                |
| - 1990s                            | 35.41<br>(31.05– 39.76) | 34.83<br>(30.62– 39.05)                 | 36.75<br>(32.24– 41.27)                    | 35.41<br>(31.05– 39.76)            | 35.65<br>(31.42– 39.88)                |
| - 2000s                            | 33.00<br>(27.82– 38.17) | 33.00<br>(27.82– 38.17)                 | 30.14<br>(24.33– 35.94)                    | 33.00<br>(27.82– 38.17)            | 33.00<br>(27.82– 38.17)                |
| - 2010s                            | 35.23<br>(33.03– 37.42) | 35.23<br>(33.03– 37.42)                 | 33.14<br>(31.70– 34.58)                    | 35.23<br>(33.03– 37.42)            | 35.23<br>(33.03– 37.42)                |



**Table S4 Potential effect modifiers of adults' sodium excretion (mmol/24h) – sensitivity analyses**

|                                                                              | Univariate              |         | Multivariate            |         |
|------------------------------------------------------------------------------|-------------------------|---------|-------------------------|---------|
|                                                                              | Slope (95% CI)          | p-value | Slope (95% CI)          | p-value |
| <b>Excluding hospital-based studies</b>                                      |                         |         |                         |         |
| Age (year)                                                                   | 0.25 (-0.59 to 1.1)     | 0.5553  | 0.11 (-0.77 to 0.98)    | 0.8121  |
| Sex (% men)                                                                  | 0.45 (-0.09 to 0.98)    | 0.0994  | 0.25 (-0.28 to 0.78)    | 0.3452  |
| Geographical location (each administrative region coded from South to North) | 3.1 (2.05 to 4.16)      | <0.0001 | 2.98 (1.77 to 4.20)     | <0.0001 |
| Rigour of 24h urine collection (not rigorous or not reported as reference)   | -13.05 (-31.03 to 4.93) | 0.1526  | -0.15 (-0.99 to 0.69)   | 0.7219  |
| Year of data collection (whole of China)                                     | 0.35 (-0.51 to 1.21)    | 0.4149  | -9.13 (-26.55 to 8.28)  | 0.2999  |
| Year of data collection (northern China only)                                | -1.21 (-2.26 to -0.17)  | 0.0239  | –                       | –       |
| Year of data collection (southern China only)                                | 1.07 (-0.02 to 2.16)    | 0.0533  | –                       | –       |
| <b>Excluding hypertensive participants</b>                                   |                         |         |                         |         |
| Age (year)                                                                   | 1.03 (0.19 to 1.88)     | 0.0172  | 0.43 (-0.34 to 1.20)    | 0.2694  |
| Sex (% men)                                                                  | 0.36 (-0.14 to 0.86)    | 0.1563  | 0.11 (-0.34 to 0.56)    | 0.6408  |
| Geographical location (each administrative region coded from South to North) | 3.31 (2.35 to 4.28)     | <0.0001 | 3.38 (2.32 to 4.45)     | <0.0001 |
| Rigour of 24h urine collection (not rigorous or not reported as reference)   | 12.22 (-7.49 to 31.92)  | 0.2206  | -0.54 (-1.24 to 0.17)   | 0.1331  |
| Year of data collection (whole of China)                                     | 0.13 (-0.68 to 0.95)    | 0.7457  | 12.31 (-3.99 to 28.61)  | 0.1363  |
| Year of data collection (northern China only)                                | -1.22 (-2.15 to -0.29)  | 0.0112  | –                       | –       |
| Year of data collection (southern China only)                                | 0.76 (-0.04 to 1.56)    | 0.0603  | –                       | –       |
| <b>Excluding ethnic minorities</b>                                           |                         |         |                         |         |
| Age (year)                                                                   | 0.23 (-0.61 to 1.07)    | 0.5887  | 0.04 (-0.81 to 0.89)    | 0.9229  |
| Sex (% men)                                                                  | 0.52 (0.05 to 0.99)     | 0.0312  | 0.25 (-0.23 to 0.74)    | 0.2996  |
| Geographical location (each administrative region coded from South to North) | 3.2 (2.19 to 4.21)      | <0.0001 | 3.11 (1.94 to 4.28)     | <0.0001 |
| Rigour of 24h urine collection (not rigorous or not reported as reference)   | -11.39 (-28.97 to 6.2)  | 0.2016  | -0.22 (-1.01 to 0.58)   | 0.5877  |
| Year of data collection (whole of China)                                     | 0.16 (-0.65 to 0.97)    | 0.6970  | -6.59 (-23.26 to 10.08) | 0.4345  |
| Year of data collection (northern China only)                                | -1.21 (-2.14 to -0.28)  | 0.0117  | –                       | –       |
| Year of data collection (southern China only)                                | 0.95 (-0.09 to 2.00)    | 0.0719  | –                       | –       |
| <b>Placing Tibet in southern China</b>                                       |                         |         |                         |         |
| Age (year)                                                                   | 0.25 (-0.59 to 1.09)    | 0.5573  | 0.08 (-0.77 to 0.94)    | 0.8491  |
| Sex (% men)                                                                  | 0.53 (0.04 to 1.01)     | 0.0337  | 0.27 (-0.23 to 0.76)    | 0.2853  |
| Geographical location (each administrative region coded from South to North) | 3.25 (2.24 to 4.27)     | <0.0001 | 3.15 (1.98 to 4.32)     | <0.0001 |
| Rigour of 24h urine collection (not rigorous or not reported as reference)   | -12.47 (-30.22 to 5.29) | 0.1665  | -0.24 (-1.04 to 0.56)   | 0.5493  |
| Year of data collection (whole of China)                                     | 0.18 (-0.64 to 0.99)    | 0.6723  | -7.85 (-24.63 to 8.92)  | 0.3547  |
| Year of data collection (northern China only)                                | -1.26 (-2.2 to -0.31)   | 0.0101  | –                       | –       |
| Year of data collection (southern China only)                                | 0.93 (-0.2 to 2.06)     | 0.1033  | –                       | –       |

**Table S5 Potential effect modifiers of adults' potassium excretion (mmol/24h) – sensitivity analyses**

|                                                                              | Univariate            |         | Multivariate          |         |
|------------------------------------------------------------------------------|-----------------------|---------|-----------------------|---------|
|                                                                              | Slope (95% CI)        | p-value | Slope (95% CI)        | p-value |
| <b>Excluding hospital-based studies</b>                                      |                       |         |                       |         |
| Age (year)                                                                   | 0.02 (-0.17 to 0.2)   | 0.8474  | -0.07 (-0.31 to 0.17) | 0.5445  |
| Sex (% men)                                                                  | 0.01 (-0.12 to 0.14)  | 0.9029  | 0.00 (-0.16 to 0.16)  | 0.9982  |
| Geographical location (each administrative region coded from South to North) | 0.16 (-0.11 to 0.42)  | 0.2476  | 0.14 (-0.17 to 0.46)  | 0.3693  |
| Rigour of 24h urine collection (not rigorous or not reported as reference)   | 1.24 (-2.74 to 5.21)  | 0.5379  | 1.77 (-2.73 to 6.27)  | 0.4347  |
| Year of data collection (whole of China)                                     | 0.12 (-0.06 to 0.31)  | 0.1927  | 0.11 (-0.1 to 0.32)   | 0.2961  |
| Year of data collection (northern China only)                                | 0.00 (-0.25 to 0.25)  | 0.9858  | –                     | –       |
| Year of data collection (southern China only)                                | 0.21 (-0.11 to 0.52)  | 0.1867  | –                     | –       |
| <b>Excluding hypertensive participants</b>                                   |                       |         |                       |         |
| Age (year)                                                                   | 0.01 (-0.21 to 0.22)  | 0.9532  | -0.04 (-0.31 to 0.23) | 0.7616  |
| Sex (% men)                                                                  | 0.08 (-0.06 to 0.22)  | 0.2842  | 0.08 (-0.09 to 0.24)  | 0.3680  |
| Geographical location (each administrative region coded from South to North) | 0.21 (-0.08 to 0.51)  | 0.1538  | 0.15 (-0.2 to 0.5)    | 0.3872  |
| Rigour of 24h urine collection (not rigorous or not reported as reference)   | 1.02 (-4.11 to 6.16)  | 0.6914  | 1.25 (-4.38 to 6.88)  | 0.6585  |
| Year of data collection (whole of China)                                     | 0.09 (-0.11 to 0.29)  | 0.3560  | 0.1 (-0.13 to 0.33)   | 0.3932  |
| Year of data collection (northern China only)                                | 0.01 (-0.27 to 0.28)  | 0.9702  | –                     | –       |
| Year of data collection (southern China only)                                | 0.12 (-0.2 to 0.44)   | 0.4515  | –                     | –       |
| <b>Excluding ethnic minorities</b>                                           |                       |         |                       |         |
| Age (year)                                                                   | 0.04 (-0.14 to 0.22)  | 0.6547  | -0.03 (-0.27 to 0.2)  | 0.7773  |
| Sex (% men)                                                                  | 0 (-0.11 to 0.12)     | 0.9483  | 0 (-0.15 to 0.14)     | 0.9725  |
| Geographical location (each administrative region coded from South to North) | 0.19 (-0.07 to 0.45)  | 0.1520  | 0.18 (-0.13 to 0.49)  | 0.2594  |
| Rigour of 24h urine collection (not rigorous or not reported as reference)   | 0.56 (-3.37 to 4.48)  | 0.7785  | 0.95 (-3.45 to 5.35)  | 0.6685  |
| Year of data collection (whole of China)                                     | 0.1 (-0.07 to 0.28)   | 0.2510  | 0.08 (-0.13 to 0.28)  | 0.4434  |
| Year of data collection (northern China only)                                | -0.05 (-0.29 to 0.18) | 0.6512  | –                     | –       |
| Year of data collection (southern China only)                                | 0.23 (-0.07 to 0.53)  | 0.1244  | –                     | –       |
| <b>Placing Tibet in southern China</b>                                       |                       |         |                       |         |
| Age (year)                                                                   | 0.02 (-0.16 to 0.2)   | 0.8311  | -0.07 (-0.31 to 0.16) | 0.5363  |
| Sex (% men)                                                                  | 0.01 (-0.11 to 0.13)  | 0.9054  | 0 (-0.15 to 0.15)     | 0.9900  |
| Geographical location (each administrative region coded from South to North) | 0.15 (-0.1 to 0.41)   | 0.2339  | 0.15 (-0.16 to 0.46)  | 0.3348  |
| Rigour of 24h urine collection (not rigorous or not reported as reference)   | 1.18 (-2.68 to 5.04)  | 0.5444  | 1.84 (-2.53 to 6.21)  | 0.4041  |
| Year of data collection (whole of China)                                     | 0.11 (-0.07 to 0.29)  | 0.2191  | 0.1 (-0.1 to 0.3)     | 0.3252  |
| Year of data collection (northern China only)                                | -0.01 (-0.25 to 0.23) | 0.9449  | –                     | –       |
| Year of data collection (southern China only)                                | 0.19 (-0.11 to 0.49)  | 0.2005  | –                     | –       |

**Figure S1. Risk of bias in the included studies**

**A. Studies reporting sodium data**

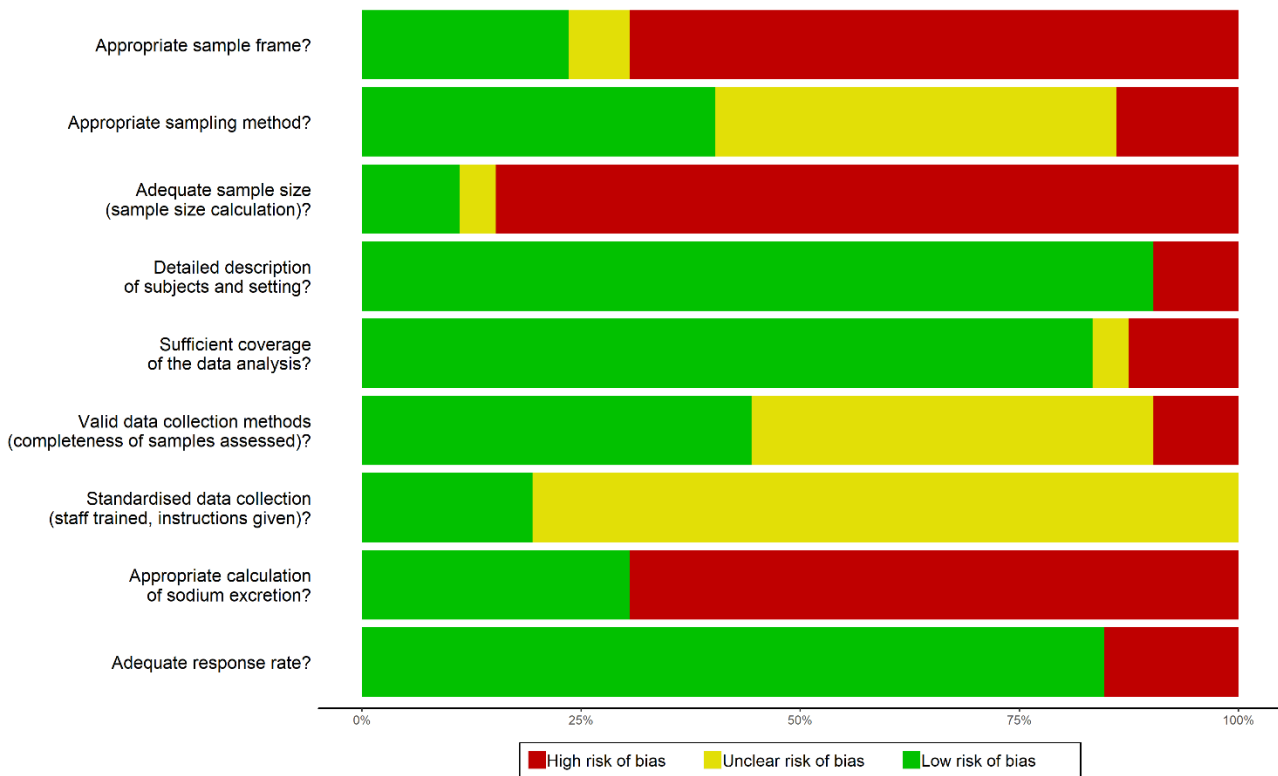

**B. Studies reporting potassium data**

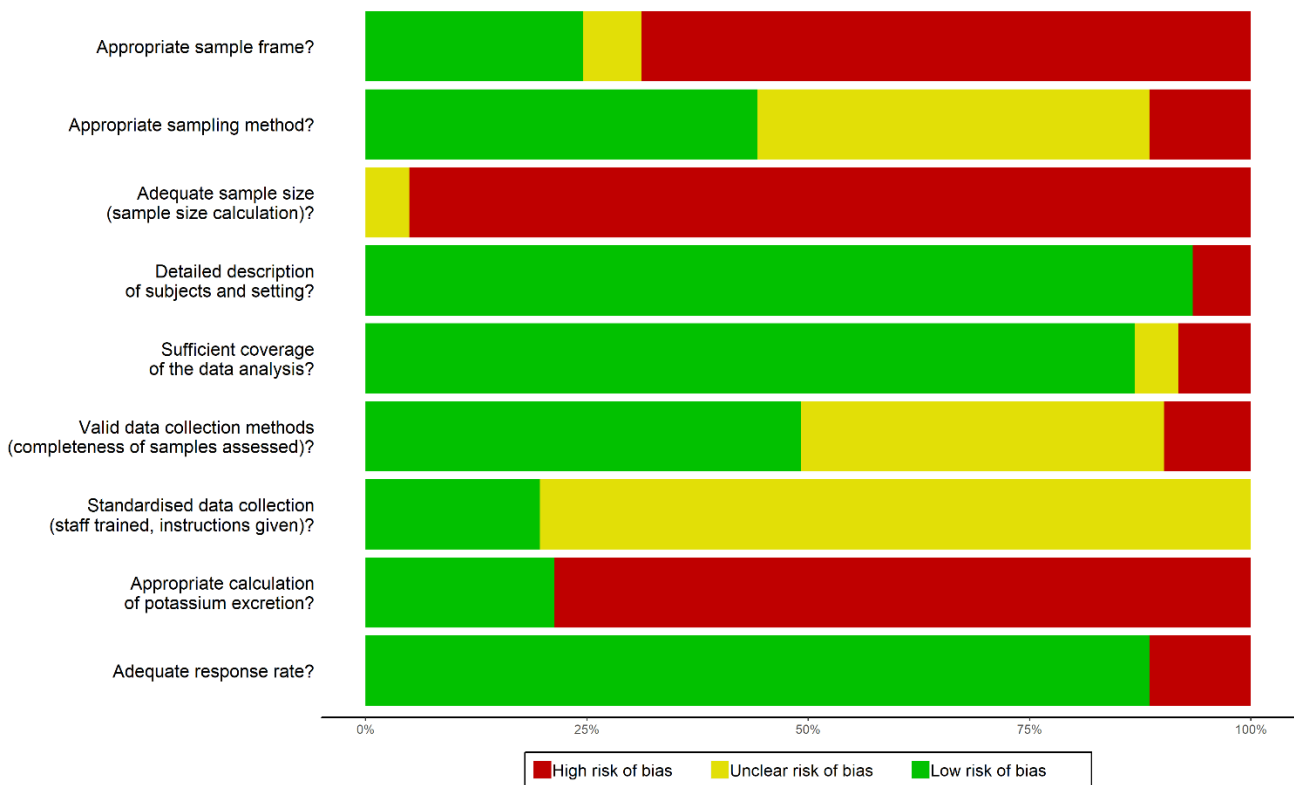

Grading details provided on the next page (text S2).

## Supplemental References

1. Liu LS, Zhang KH, Wang J, Zhang XE, Wu HJ, Lin MQ, Gui RL, Du JH, Gu ML. Primary prevention of hypertension by sodium restriction. *Chinese Medical Journal*. 1987;100(11):899–902.
2. Yang Y. [Renal function of cations excretion in children predisposed to essential hypertension]. *Zhonghua Yu Fang Yi Xue Za Zhi [Chinese Journal of Preventive Medicine]*. 1991;25(3):152–154.
3. Zhu KM, He SP, Pan XQ, Zheng XR, Gu YA. The relation of urinary cations to blood pressure in boys aged seven to eight years. *American Journal of Epidemiology*. 1987;126(4):658–663.
4. Wu Y, Cai R, Zhou B, Xu X. Effects of genetic factors and dietary electrolytes on blood pressure of rural secondary school students in Hanzhong. *Chinese Medical Sciences Journal = Chung-Kuo I Hsueh K'o Hsueh Tsa Chih*. 1991;6(3):148–152.
5. Xu X.-J., Liang X.-H., Hu G.-M., Mao X.-M., Quanyangyi, Ozawa Y., Zhang X.-Y., Dilixiati, Maimaiti-Yasen. Ambulatory blood pressure and biochemical indicator analysis of 9-10 years old Kazakhstan Clan children in Xinjiang Baliken area. *Journal of Clinical Rehabilitative Tissue Engineering Research*. 2009;13(7):1379–1382.
6. Zhang Q, Liao Y, Tang C, Du J, Jin H. Twenty-four-hour urinary sodium excretion and postural orthostatic tachycardia syndrome. *The Journal of Pediatrics*. 2012;161(2):281–284.
7. Li J., Zhang Q., Liao Y., Zhang C., Du J. Clinical value of 24-hour urinary sodium determination in children with postural tachycardia syndrome. *Zhonghua er ke za zhi = Chinese journal of pediatrics*. 2015;53(3):203–207.
8. Zhang L., Zhao F., Zhang P., Gao J., Liu C., He F.J., Lin C.-P. A pilot study to validate a standardized one-week salt estimation method evaluating salt intake and its sources for family members in China. *Nutrients*. 2015;7(2):751–763.
9. Li J., Liao Y., Du J., Zhang Q. Relationship between 24-hour urinary sodium and renin-angiotensin-aldosterone system in children with postural tachycardia syndrome. *National Medical Journal of China*. 2015;95(36):2928–2932.
10. He FJ, Wu Y, Feng X-X, Ma J, Ma Y, Wang H, Zhang J, Yuan J, Lin C-P, Nowson C, MacGregor GA. School based education programme to reduce salt intake in children and their families (School-EduSalt): cluster randomised controlled trial. *BMJ (Clinical research ed.)*. 2015;350:h770.
11. Tsai TJ, Su CJ, Chen YM, Hsieh BS, Chen WY, Yen TS. Urinary kallikrein excretion in chronic renal disease with respect to salt intake and renal reserve. *Journal of the Formosan Medical Association = Taiwan Yi Zhi*. 1991;90(6):525–530.
12. Zhao GS, Yuan XY, Gong BQ, Wang SZ, Cheng ZH. Nutrition, metabolism, and hypertension. A comparative survey between dietary variables and blood pressure among three nationalities in China. *Journal of Clinical Hypertension*. 1986;2(2):124–131.
13. Liu LS, Zheng DY, Lai SH, Wang GQ, Zhang YL. Variability in 24-hour urine sodium excretion in Chinese adults. *Chinese Medical Journal*. 1986;99(5):424–426.
14. Kesteloot H, Huang DX, Li YL, Geboers J, Joossens JV. The relationship between cations and blood pressure in the People's Republic of China. *Hypertension (Dallas, Tex.: 1979)*. 1987;9(6):654–659.
15. Liu LS, Zheng DY, Jin L, Liao YL, Liu K, Stamler J. Variability of urinary sodium and potassium excretion in north Chinese men. *Journal of Hypertension*. 1987;5(3):331–335.
16. Intersalt Cooperative Research Group. Intersalt: an international study of electrolyte excretion and blood pressure. Results for 24 hour urinary sodium and potassium excretion. *BMJ : British Medical Journal*. 1988;297(6644):319–328.

17. He J, Tell GS, Tang YC, Mo PS, He GQ. Relation of electrolytes to blood pressure in men. The Yi people study. *Hypertension (Dallas, Tex.: 1979)*. 1991;17(3):378–385.
18. He J, Klag MJ, Whelton PK, Chen JY, Mo JP, Qian MC, Coresh J, Mo PS, He GQ. Agreement between overnight and 24-hour urinary cation excretions in southern Chinese men. *American Journal of Epidemiology*. 1993;137(11):1212–1220.
19. Chan EL, MacDonald D, Ho SC, Swaminathan R. Potassium intake and urinary calcium excretion in healthy subjects. *Mineral and Electrolyte Metabolism*. 1993;19(1):36–38.
20. Pan WH, Chen JY, Chen YC, Tsai WY. Diurnal electrolyte excretion pattern affects estimates of electrolyte status based on 24-hour, half-day, and overnight urine. *The Chinese Journal of Physiology*. 1994;37(1):49–53.
21. Tian HG, Nan Y, Shao RC, Dong QN, Hu G, Pietinen P, Nissinen A. Associations between blood pressure and dietary intake and urinary excretion of electrolytes in a Chinese population. *Journal of Hypertension*. 1995;13(1):49–56.
22. Hou R, Liu Z, Liu J. [The study of sympathetic nervous activity during the period of chronic salt loading in salt-sensitive subjects]. *Chinese Journal of Cardiology*. 1997;25(6):414–418.
23. Chan TY, Chan AY, Lau JT, Critchley JA. Sodium and potassium intakes and blood pressure in Chinese adults in Hong Kong: A comparison with southern China. *Asia Pacific Journal of Clinical Nutrition*. 1998;7(1):33–36.
24. Liu L, Mizushima S, Gao M. Body mass index, urinary sodium excretion, and blood pressure in seven Chinese populations: results from the WHO Cardiovascular Diseases and Alimentary Comparison Study. *CVD Prev*. 2000;3:11–17.
25. Cheung BM, Ho SP, Cheung AH, Lau CP. Diastolic blood pressure is related to urinary sodium excretion in hypertensive Chinese patients. *QJM: monthly journal of the Association of Physicians*. 2000;93(3):163–168.
26. Gu D, He J, Wu X, Duan X, Whelton PK. Effect of potassium supplementation on blood pressure in Chinese: a randomized, placebo-controlled trial. *Journal of Hypertension*. 2001;19(7):1325–1331.
27. Zhu D, Liu Z, Liu J, Liu Y. Renal endogenous ET-1 and urinary sodium excretion and microalbuminuria in human salt-sensitive hypertension. *Journal of Pharmaceutical Analysis*. 2001;13(1):30–32.
28. Jumabay M, Kawamura H, Mitsubayashi H, Ozawa Y, Izumi Y, Kasamaki Y, Shimabukuro H, Cheng Z, Aisa M, Wang S. Urinary electrolytes and hypertension in elderly Kazakhs. *Clinical and Experimental Nephrology*. 2001;5(4):217–221.
29. Xie J, Liu L, Kesteloot H. Blood pressure and urinary cations in a low-fat intake Chinese population sample. *Acta Cardiologica*. 2001;56(3):163–168.
30. Yamori Y, Liu L, Mu L, Zhao H, Pen Y, Hu Z, Kuga S, Negishi H, Ikeda K, Japan-China Cooperative Study Group: Chongqing Project. Diet-related factors, educational levels and blood pressure in a Chinese population sample: findings from the Japan-China Cooperative Research Project. *Hypertension Research: Official Journal of the Japanese Society of Hypertension*. 2002;25(4):559–564.
31. Zhao L, Stamler J, Yan LL, Zhou B, Wu Y, Liu K, Daviglus ML, Dennis BH, Elliott P, Ueshima H, Yang J, Zhu L, Guo D, INTERMAP Research Group. Blood pressure differences between northern and southern Chinese: role of dietary factors: the International Study on Macronutrients and Blood Pressure. *Hypertension (Dallas, Tex.: 1979)*. 2004;43(6):1332–1337.
32. Cheung DBMY, Law CY, McGhee SM, Ng PPY, Lau C-P, Kumana CR. The Relationship Between Sodium and Blood Pressure in Hong Kong Chinese. *Clinical Research and Regulatory Affairs*. 2004;21(2):145–154.

33. Zhou X., Liu J.-X., Shi R., Yang N., Song D.-L., Pang W., Li Y.-M. Compound ion salt, a novel low-sodium salt substitute: From animal study to community-based population trial. *American Journal of Hypertension*. 2009;22(9):934–942.
34. He J., Gu D., Chen J., Jaquish C.E., Rao D.C., Hixson J.E., Chen J.-C., Duan X., Huang J.-F., Chen C.-S., Kelly T.N., Bazzano L.A., Whelton P.K. Gender difference in blood pressure responses to dietary sodium intervention in the GenSalt study. *Journal of Hypertension*. 2009;27(1):48–54.
35. Zhang G, Ma J, Guo X, Dong J, Chen X, Zhang J, Su J, Tang J, Xu A. [Field observation on the effect of low-sodium and high-potassium salt substitute on blood pressure in the rural community-based population in China]. *Zhonghua Liu Xing Bing Xue Za Zhi*. 2011;32(9):859–863.
36. Liu Y, Wu J, Zhang L, Xu H, Liu Z, Lu J, Zhang J, Feng L, Guo Q, Zhao C, Liu J, Wei H, Cao S, Zhao H. [Influence factors of salt-sensitive hypertension and responses of blood pressure and urinary sodium and potassium excretion to acute oral saline loading among essential hypertensive patients]. *Zhonghua Xin Xue Guan Bing Za Zhi*. 2013;41(12):1015–1019.
37. Gu D, Zhao Q, Chen J, Chen J-C, Huang J, Bazzano LA, Lu F, Mu J, Li J, Cao J, Mills K, Chen C-S, Rice T, Hamm LL, He J. Reproducibility of blood pressure responses to dietary sodium and potassium interventions: the GenSalt study. *Hypertension (Dallas, Tex.: 1979)*. 2013;62(3):499–505.
38. Chen J, Tian Y, Liao Y, Yang S, Li Z, He C, Tu D, Sun X. Salt-Restriction-Spoon Improved the Salt Intake among Residents in China. *PLoS ONE*. 2013;8(11).
39. Chen J, Liao Y, Li Z, Tian Y, Yang S, Tu D, He C, Sun X. [Analysis of the determinants of salt-restriction behavior among urban and rural residents in Beijing with health belief model]. *Beijing Da Xue Xue Bao. Yi Xue Ban = Journal of Peking University. Health Sciences*. 2014;46(2):242–246.
40. Hu B.-C., Li Y., Liu M., Li L.-H., Sheng C.-S., Zhang Y., Wang J.-G. Blood pressure and urinary sodium excretion in relation to 16 genetic polymorphisms in the natriuretic peptide system in Chinese. *Endocrine Journal*. 2014;61(9):861–874.
41. Xu J., Wang M., Chen Y., Zhen B., Li J., Luan W., Ning F., Liu H., Ma J., Ma G. Estimation of salt intake by 24-hour urinary sodium excretion: a cross-sectional study in Yantai, China. *BMC public health*. 2014;14((Xu J.)):136.
42. Zhou X, Yuan F, Ji W-J, Guo Z-Z, Zhang L, Lu R-Y, Liu X, Liu H-M, Zhang W-C, Jiang T-M, Zhang Z, Li Y-M. High-salt intake induced visceral adipose tissue hypoxia and its association with circulating monocyte subsets in humans. *Obesity (Silver Spring, Md.)*. 2014;22(6):1470–1476.
43. Liu Z-M, Ho SC, Tang N, Chan R, Chen Y-M, Woo J. Urinary sodium excretion and dietary sources of sodium intake in Chinese postmenopausal women with prehypertension. *PloS One*. 2014;9(8):e104018.
44. Ge Z., Guo X., Chen X., Tang J., Yan L., Ren J., Zhang J., Lu Z., Dong J., Xu J., Cai X., Liang H., Ma J. Association between 24 h urinary sodium and potassium excretion and the metabolic syndrome in Chinese adults: The Shandong and Ministry of Health Action on Salt and Hypertension (SMASH) study. *British Journal of Nutrition*. 2015;113(6):996–1002.
45. Ge Z, Zhang J, Chen X, Guo X, Yan L, Tang J, Cai X, Xu J, Hou L, Ma J. [Association between 24 h urinary sodium to potassium ratio and metabolic syndrome in Chinese adults]. *Chinese Journal of Epidemiology*. 2015;36(8):790–793.
46. Wang Y, Mu JJ, Geng LK, Wang D, Ren KY, Guo TS, Chu C, Xie BQ, Liu FQ, Yuan ZY. Effect of salt intake and potassium supplementation on brachial-ankle pulse wave velocity in Chinese subjects: an interventional study. *Brazilian Journal of Medical and*

*Biological Research = Revista Brasileira De Pesquisas Medicas E Biologicas.*  
2015;48(1):83–90.

47. Han W., Sun N., Chen Y., Wang H., Xi Y., Ma Z. Validation of the spot urine in evaluating 24-hour sodium excretion in Chinese hypertension patients. *American Journal of Hypertension.* 2015;28(11):1368–1375.
48. Wang X., Li X., Vaartjes I., Neal B., Bots M.L., Hoes A.W., Wu Y. Does education level affect the efficacy of a community based salt reduction program? - A post-hoc analysis of the China Rural Health Initiative Sodium Reduction Study (CRHI-SRS). *BMC public health.* 2016;16(1):759.
49. Zhang Y., Li F.X., Liu F.-Q., Chu C., Wang Y., Wang D., Guo T.-S., Wang J.-K., Guan G.-C., Ren K.-Y., Mu J.-J. Elevation of fasting ghrelin in healthy human subjects consuming a high-salt diet: A novel mechanism of obesity? *Nutrients.* 2016;8(6).
50. Yongqing Z., Ming W., Jian S., Pengfei L., Xiaoqun P., Meihua D., Peian L., Jianmei D., Guoyu Z., Jie Y., Ping L., Yan X. Prevalence, awareness, treatment and control of hypertension and sodium intake in Jiangsu Province, China: a baseline study in 2014. *BMC public health.* 2016;16((Yongqing Z.) Jiangsu provincial Center for Disease Control and Prevention, 210009, Nanjing, China. zyq6943@163.com):56.
51. Peng Y, Li W, Wang Y, Chen H, Bo J, Wang X, Liu L. Validation and Assessment of Three Methods to Estimate 24-h Urinary Sodium Excretion from Spot Urine Samples in Chinese Adults. *PloS One.* 2016;11(2):e0149655.
52. Zheng W-L, Chu C, Lv Y-B, Wang Y, Hu J-W, Ma Q, Yan Y, Cao Y-M, Dang X-L, Wang K-K, Mu J-J. Effect of Salt Intake on Serum Glucagon-Like Peptide-1 Levels in Normotensive Salt-Sensitive Subjects. *Kidney & Blood Pressure Research.* 2017;42(4):728–737.
53. Guo T-S, Dai Y, Ren K-Y, Mu J-J, Ren J, Wang D, Wang Y, Chu C, Li Y, Yuan Z-Y. Effects of salt loading and potassium supplement on the circadian blood pressure profile in salt-sensitive Chinese patients. *Blood Pressure Monitoring.* 2017;22(6):307–313.
54. Li Q, Cui Y, Jin R, Lang H, Yu H, Sun F, He C, Ma T, Li Y, Zhou X, Liu D, Jia H, Chen X, Zhu Z. Enjoyment of Spicy Flavor Enhances Central Salty-Taste Perception and Reduces Salt Intake and Blood Pressure. *Hypertension (Dallas, Tex.: 1979).* 2017;70(6):1291–1299.
55. Deng T, Mai Z, Cai C, Duan X, Zhu W, Zhang T, Wu W, Zeng G. Influence of weight status on 24-hour urine composition in adults without urolithiasis: A nationwide study based on a Chinese Han population. *PloS One.* 2017;12(9):e0184655.
56. Ma W, Yin X, Zhang R, Liu F, Yang D, Fan Y, Rong J, Tian M, Yu Y. Validation and Assessment of Three Methods to Estimate 24-h Urinary Sodium Excretion from Spot Urine Samples in High-Risk Elder Patients of Stroke from the Rural Areas of Shaanxi Province. *International Journal of Environmental Research and Public Health.* 2017;14(10).
57. Zhou L, Tian Y, Fu J-J, Jiang Y-Y, Bai Y-M, Zhang Z-H, Hu X-H, Lian H-W, Guo M, Yang Z-X, Zhao L-C. Validation of spot urine in predicting 24-h sodium excretion at the individual level. *The American Journal of Clinical Nutrition.* 2017;105(6):1291–1296.
58. Dong W, Zhang Q, Jiang J, Chen H, Chen X, Shao S, Liu J, Ji Y. [Evaluating the sodium intake of community residents in Shantou city by 24-h urine method]. *Chin J Prev Contr Chron Di.* 2017;25(7):481–484.
59. Wang Y, Chu C, Wang K-K, Hu J-W, Yan Y, Lv Y-B, Cao Y-M, Zheng W-L, Dang X-L, Xu J-T, Chen W, Yuan Z-Y, Mu J-J. Effect of Salt Intake on Plasma and Urinary Uric Acid Levels in Chinese Adults: An Interventional Trial. *Scientific Reports.* 2018;8(1):1434.

60. Hu J-W, Wang Y, Chu C, Mu J-J. Effect of Salt Intervention on Serum Levels of Fibroblast Growth Factor 23 (FGF23) in Chinese Adults: An Intervention Study. *Medical Science Monitor: International Medical Journal of Experimental and Clinical Research*. 2018;24:1948–1954.
61. Duan L, Liu W, Zhang P, Liu S, Liu X, Sang M, Liu L, Lin H, Sang Z. Salt Intake of Lactating Women as Assessed by Modified Food Weighted Records. *Journal of the American College of Nutrition*. 2018;37(7):614–619.
